1  
2  
3  
4  
5  
6  
7  
8  
9  
10  
11  
12  
13  
14  
15  
16  
17  
18  
19  
20  
21  
22  
23  
24  
25  
26  
27

# **Aging markers in human urine: A comprehensive, non-targeted LC-MS study**

Takayuki Teruya<sup>1</sup>, Haruhisa Goga<sup>1,2</sup>, and Mitsuhiro Yanagida<sup>1\*</sup>

<sup>1</sup> G0 Cell Unit, Okinawa Institute of Science and Technology Graduate University (OIST), Okinawa, Japan

<sup>2</sup> Forensic Laboratory, Department of Criminal Investigation, Okinawa Prefectural Police HQ, Okinawa, Japan (on leave of absence)

\* To whom correspondence should be addressed

M. Yanagida, G0 Cell Unit, Okinawa Institute of Science and Technology Graduate University (OIST), Onna-son, Okinawa, 904-0495, Japan

Tel +81 98 966 8658

Fax +81 98 966 2890

Email; myanagid@gmail.com

Key words

Age markers in urine, non-targeted metabolomics, human aging, LC-MS, highly correlated metabolites, leucine, pseudouridine,

Short title: Aging markers in human urine

28 **Summary**

29 Metabolites in human biofluids document individual physiological status. We  
30 conducted comprehensive, non-targeted, non-invasive metabolomic analysis of urine  
31 from 27 healthy human subjects, comprising 13 youths ( $30\pm 3$  yr) and 14 seniors  
32 ( $76\pm 4$  yr). Quantitative analysis of 99 metabolites revealed 55 that were linked to  
33 aging, displaying significant differences in abundance between the two groups.  
34 These include 13 standard amino acids, 5 methylated, 4 acetylated, and 9 other  
35 amino acids, 6 nucleosides, nucleobases, and derivatives, 4 sugar derivatives, 5  
36 sugar phosphates, 4 carnitines, 2 hydroxybutyrates, 1 choline, and 1 ethanolamine  
37 derivative, and glutathione disulfide. Abundances of 53 compounds decreased, while  
38 2 increased in elderly people. Many age-linked markers were highly correlated; 42 of  
39 55 compounds, showed Pearson's correlation coefficients larger than 0.70. As  
40 metabolite profiles of urine and blood are quite different, age-related information  
41 in urine components offer yet more valuable insights into aging mechanisms of  
42 endocrine system and related organ systems.  
43

## 44 **Introduction**

45           Elderly people are acutely aware of the progressive aging of different body  
46 parts, but quantifying and characterizing physiological aging is less intuitive.  
47 Nonetheless, assessment of aging and determination of aging type by analyzing  
48 metabolites in biofluids, such as blood and urine, may help us to understand broadly-  
49 featured aging of the human body (Kampmann et al., 1974) (Ames, 1989) (Short et  
50 al., 2005) (Slupsky et al., 2007) (Lawton et al., 2008) (Mishur and Rea, 2012) (Yu et  
51 al., 2012) (Menni et al., 2013) (Gonzalez-Covarrubias et al., 2013) (Auro et al., 2014)  
52 (Chaleckis et al., 2016) (Hertel et al., 2016) (Jove et al., 2016) (Rist et al., 2017)  
53 (Chak et al., 2019). Age-dependent changes of metabolite abundances may be  
54 valuable to determine the molecular causes of impaired organ functions. Technology  
55 that enables simple and rapid measurement of urinary metabolites, which can be  
56 collected non-invasively, has certain advantages over methods using blood. Urinary  
57 metabolites are promising biological samples for monitoring health parameters if the  
58 metabolic processes resulting in production of those metabolites can be fully  
59 understood. To date, few comprehensive approaches to investigate human urinary  
60 metabolites in aging have been reported (Thevenot et al., 2015) (Hertel et al., 2016)  
61 (Rist et al., 2017). Urination is a primary route by which the body eliminates water-  
62 soluble waste products. Accordingly, urine has been broadly utilized for diagnosis of  
63 renal dysfunction in diverse kidney diseases (Han et al., 2002) (Eknoyan et al., 2003)  
64 (Mishra et al., 2005) (Parikh et al., 2006) (Pisitkun et al., 2006) (Vaidya et al., 2008).  
65 Nonetheless, because urinary metabolites originate in all organ systems, they may  
66 be useful to examine human aging. In this study, we analyzed urinary metabolites

67 in elderly and young subjects, using comprehensive metabolomics to identify  
68 metabolites linked to aging. Striking correlations of many urine metabolites with  
69 age were found.  
70

## 71 **Results**

### 72 **Collection of urine samples**

73 Samples of morning urine, immediately after awaking, were collected  
74 from healthy volunteer subjects (elderly, 75.8±3.9 yr, and young, 30.6±3.2 yr;  
75 **Supplementary Table s1** shows gender and BMI) in Onna Village, Okinawa,  
76 Japan. Precautions taken for sample collection are described in the Materials  
77 and Methods. Basic data analytical procedures were similar to those previously  
78 described (Chaleckis et al., 2016) (Teruya et al., 2019) (Kameda et al., 2020).

79

### 80 **99 urine metabolites identified**

81 Ninety-nine urinary metabolites, about half of which are amino acids and  
82 their derivatives, were identified and quantified using liquid chromatography – mass  
83 spectrometry (LC – MS) and MZmine 2 (Pluskal et al., 2010a) (Teruya et al., 2019)  
84 (**Supplemental Table s2**). These compounds were subdivided into 12 groups,  
85 containing 17 standard amino acids, 12 methylated amino acids, 6 acetylated amino  
86 acids and 15 other amino acids, 12 nucleosides, nucleobases, and derivatives, 4 sugar  
87 derivatives, 6 sugar phosphates, 3 vitamins and coenzymes (pantothenate, 4-  
88 aminobenzoate, nicotinamide), 4 choline and ethanolamine derivatives, 8 carnitines,  
89 11 organic acids, and 1 antioxidant (oxidized form of glutathione, GSSG). Small amino  
90 acids, such as glycine and alanine, were not detected in our analysis due to the  
91 mass cutoff (100 m/z) used. Levels of individual compounds, categorized by  
92 abundance as H (high, >10<sup>8</sup>), M (medium, 10<sup>7</sup>~10<sup>8</sup>) or L (low, <10<sup>7</sup>), were estimated  
93 based upon mass spectroscopic peak area (Chaleckis et al., 2014) (Chaleckis et al.,

94 2016). Some compounds varied widely from one individual to the next and are  
95 denoted as H-L, H-M or M-L. According to abundance, there were 7 H, 19 H-M, 7 H-  
96 L, 5 M, 45 M-L and 16 L compounds. Twenty-six urinary metabolites were abundant  
97 (H or H-M), the great majority of which were amino acids and their derivatives, such  
98 as the methylated amino acids, betaine and dimethyl-arginine, but they also  
99 included nucleosides, such as pseudouridine and N-methyl-guanosine. In blood,  
100 sugar phosphates and methylated amino acids were enriched in red blood cells  
101 (Chaleckis et al., 2014) (Chaleckis et al., 2016). In urine, sugar phosphates are age-  
102 related, except for glucose-6-phosphate. We show below that about half of all  
103 urinary metabolites are age-related.

104

#### 105 **Most urinary age markers decreased with age**

106 Of 99 urinary metabolites assayed in 27 subjects, 55 showed statistically significant  
107 differences between young and elderly ( $p$ -values,  $0.00003 < p < 0.05$ ) (**Fig. 1**). Thus,  
108 about half of these compounds are affected by aging, with most becoming less  
109 abundant in elderly subjects. Two exceptions, myo-inositol and glutathione disulfide  
110 (GSSG), were more abundant in elderly samples. In other words, ~50% of all urinary  
111 metabolites decline in old age. Five of 55 metabolites, creatinine, dimethyl  
112 guanosine, decanoyl-carnitine, N-acetyl-aspartate, and tryptophan, were previously  
113 reported as urinary age markers (Kampmann et al., 1974) (Slupsky et al., 2007)  
114 (Thevenot et al., 2015) (Rist et al., 2017). myo-Inositol and GSSG increased 1.34-  
115 and 6.96-fold, respectively (**Table 1**). The increase of GSSG was striking, though its  
116 abundance in urine was rather low. Many metabolites diminished to less than half in

117 urine of elderly subjects [fructose-1,6-diphosphate (0.14), carnosine (0.34),  
118 glycerophosphate (0.32), 2- and 3-hydroxybutyrate (0.33, 0.27, respectively), and  
119 octanoryl-carnitine (0.40)].

120

## 121 **Highly correlated age-linked urinary metabolites**

122 To understand relationships among urine metabolites, Pearson's correlation  
123 coefficients were calculated from abundance data for all 55 age-linked urinary  
124 metabolites of all 27 subjects (Methods section). The highest correlation, 0.92, was  
125 obtained for isoleucine – leucine and N-methyl guanosine – dimethyl guanosine (**Fig.**  
126 **2A**). This is probably due to their similar chemical structures and proximity in  
127 biochemical pathways (see below and KEGG, <https://www.genome.jp/kegg/>).  
128 However, correlation values 0.91 obtained for glycerol-phosphate – 3-  
129 hydroxybutyrate, pseudouridine – 2-hydroxybutyrate, and pseudouridine – isoleucine  
130 clearly have a different explanation. Fifteen urinary metabolites having correlation  
131 values >0.85 formed a network (**Fig. 2B**). The high correlation between  
132 pseudouridine and isoleucine seems to be a key connection between two groups of  
133 metabolites. Additionally, the connections of creatinine to pseudouridine and 3-  
134 hydroxybutyrate to glutamine appeared to be required for further correlation (see  
135 below). In the case of a creatinine-related network, 15 metabolites have correlation  
136 coefficients from 0.71~0.84 (**Fig. 2C**). Creatinine, a known waste product from  
137 muscle (Heymsfield et al., 1983) (Baxmann et al., 2008), is correlated with many  
138 metabolites. It even shows a negative correlation with GSSG (**Fig. 2D**).

139 Pairwise correlation analyses revealed 21 pairs of compounds with

140 correlation coefficients  $>0.85$  (**Fig. 2A**). These show a network consisting of two  
141 groups, one centered around pseudouridine and the other around isoleucine (**Fig.**  
142 **2B**). This suggests that compounds within each of these groups may be  
143 metabolically linked.

144 When urinary compounds with correlation coefficients larger than 0.7 were  
145 selected, the majority of age-linked metabolites formed a large network consisting of  
146 42 metabolites (**Supplemental Fig. S1**). Since all age-linked metabolites displayed  
147 p-values  $< 0.05$  in dot plot profiling, the fact that the great majority ( $42/55 = 76\%$ )  
148 form such a large age-linked correlation network is quite impressive.

149

#### 150 **Some age-linked metabolites were not highly correlated**

151 On the other hand, 13 compounds, though they were age-related, showed  
152 only weak correlations ( $<0.7$ ) with the other 42 age-linked urinary metabolites  
153 (**Supplemental Fig. S1**). Aspartate, a standard amino acid having an acidic side  
154 chain, showed maximal, but inverse correlation with GSSG ( $-0.67$ ). Aspartate has a  
155 correlation coefficient of 0.65 with N-acetyl aspartate, indicating that structural  
156 similarity might partly explain the weak correlation. S-adenosyl-homocysteine did not  
157 show correlation values higher than 0.41 (N-methyl-adenosine). Although the  
158 correlation is rather low, the two compounds exhibit structural similarity. Similarly,  
159 lysine, dimethyl-lysine, trimethyl-lysine, and N6-acetyl-lysine did not show the  
160 correlation coefficients higher than 0.5 among them. These metabolites diminish  
161 significantly in urine of elderly people. Fructose-1,6-diphosphate showed a maximal  
162 correlation value (0.58) with pentose-phosphate and gluconate, all carbohydrates,



163 but correlations were low (**Supplemental Fig. S2**). Whether these metabolites  
164 decline in elderly subjects as a consequence of aging or as a cause of it, remains to  
165 be investigated.

166

### 167 **Heatmap analysis of urinary metabolites linked to aging**

168 We then employed a heatmap to visualize the quantitative profile of age-  
169 linked urinary metabolites in individual subjects (**Fig. 3**). Since most of these  
170 metabolites declined in the elderly, matrix color represents metabolite abundance for  
171 individual subjects (t-score<40 white, low; 40~50 thin red, slight low; 50~60  
172 moderate red, slight high; >60 deep red, high). Elderly samples to the left were  
173 mostly white or pale red (lower level), except for myo-inositol and GSSG, which were  
174 moderate or deep red (higher level). Thus, a heatmap of urinary metabolites  
175 graphically illustrates the degree of urinary metabolite aging for individual subjects,  
176 so that subjects may be compared one with another. Two subjects (elderly 11, 81F  
177 and young 15, 33M) showed patterns remarkably like those of the opposite age  
178 group.

179

### 180 **Principal component analysis of age-linked metabolites**

181 Implications of urinary compounds in aging should also be cross examined  
182 using results of blood compound analyses. However, as these compounds decrease  
183 in urine of elderly people, the results are consistent with actual aging. Some urinary  
184 metabolites may be implicated in sustaining health and slowing aging. To integrate  
185 quantitative metabolite abundance data from individual subjects, abundances of

186 these 55 age-related metabolites were subjected to principal component analysis  
187 (PCA) (Nakamura et al., 1988) (Kameda et al., 2020). Subjects were separated into  
188 2 groups (red for elderly and blue for young subjects) represented by negative and  
189 positive values of principal component (PC) 1, respectively (**Fig. 4A**). One elderly  
190 subject 11 (81F) was in the middle of the young group and one young subject 15  
191 (33M) was in the group of elderly subjects in the PCA plot (**Fig. 4A**). These are  
192 consistent with results plotted in the heatmap (**Fig. 3**). The PC1 score and  
193 chronological age of the subject showed a high correlation with  $r=0.80$ . (**Fig. 4B**).

194

#### 195 **Negative correlation between GSSG and age-linked metabolites**

196 GSSG showed significant negative correlations with some age-linked  
197 metabolites (N-acetyl aspartate, N-methyl guanosine, dimethyl guanosine,  
198 pseudouridine, quinolinic acid, creatinine, N-methyl-histidine, etc.) (**Fig. 5A**). While  
199 the oxidized disulfide form was detected in elderly samples, but the reduced form  
200 was not detected in young or elderly samples. Thus only the inactive form of  
201 glutathione was detected in elderly samples. A possible interpretation is that the  
202 active reduced form glutathione (GSH) may be very reactive and short-lived as a  
203 metabolite (see Discussion). The abundance of GSSG in 27 subjects is shown  
204 together with N-acetyl aspartate, N-methyl guanosine, dimethyl guanosine,  
205 pseudouridine, and chronological age of subject (**Fig. 5B-F**). GSSG was low to  
206 undetectable in 5 young subjects, but accumulated in the elderly samples (**Fig. 5F**).

207 GSSG showed different degrees of abundance in different subjects, and  
208 was virtually absent in young subjects, but in elderly subjects, its abundance

209 increased and paralleled the abundance of creatinine in young subjects. Thus GSSG  
210 abundance was inversely related to aging. The reason for this increase of GSSG in  
211 elderly urine is probably due to the absence or declining effectiveness of a  
212 mechanism to metabolize and reprocess GSSG by the elderly. Such a reductive  
213 mechanism does exist in young subjects; however, the redox environment regarding  
214 glutathione appears to be altered during aging. Inability to reduce oxidized GSSG  
215 may accelerate aging.  
216

## 217 **Discussion**

218           We initially investigated metabolomics of a simple model eukaryote, fission  
219 yeast (*Schizosaccharomyces pombe*) using yeast genetic technology to identify and  
220 determine metabolite profiles in wild type and mutant cell extracts (Pluskal et al.,  
221 2010b) (Pluskal et al., 2016) (Pluskal and Yanagida, 2016a) (Pluskal and Yanagida,  
222 2016b). By adapting the software MZmine 2 for metabolite identification (Pluskal et  
223 al., 2010a) (Pluskal et al., 2012), we found that metabolomics of fission yeast and  
224 humans are surprisingly similar in regard to metabolite composition (Chaleckis et al.,  
225 2014). Metabolites detected in fission yeast and human whole blood were 75%  
226 identical. Given this unexpected similarity, we adapted our techniques to human  
227 blood metabolites to better understand health, disease, and longevity (Chaleckis et  
228 al., 2014) (Chaleckis et al., 2016) (Teruya et al., 2019) (Kameda et al., 2020).

229

## 230 **Distinction of aging information between blood and urine.**

231           Urinary metabolites offer a non-invasive means of obtaining aging  
232 information. The present results indicate that urinary aging information may be  
233 distinct from that obtainable from blood. Blood metabolites derived from plasma and  
234 red blood cells of elderly subjects reflect a decrease in antioxidant production and  
235 muscle activity or increasing inefficiency of nitrogen metabolism (Chaleckis et al.,  
236 2016). Aging information obtained from urine will be useful, as human aging is  
237 exceedingly complex. In the present study, we identified 55 human urinary aging  
238 markers using non-targeted, comprehensive LC-MS. Since urine contains 99  
239 compounds, many urinary metabolites such as vitamins (pantothenate and

240 nicotinamide) and organic acids (citrate, malate) neither significantly decreased nor  
241 increased so that about a half of urinary metabolites are not age markers. In aged  
242 subjects, levels of protein, nucleic acid and lipid synthesis, modification, and turnover  
243 may decrease due to reduced physical activity (Hughes et al., 2002) (Pollack et al.,  
244 2002) (Maynard et al., 2015), resulting in declining metabolite abundances.  
245 Metabolite data may be considered as an overview of the physiological state of all  
246 tissues and organs. Hence these 55 metabolites constitute a panorama of human  
247 aging as seen through urine composition. Alternatively, these may not represent  
248 actual human aging, but may represent voluntary lifestyle changes that may be  
249 reversible regardless of actual age.

250

### 251 **Myoinositol, GSSG and pseudouridine.**

252 Two exceptional urinary age metabolites, myo-inositol and presumably  
253 inactive, oxidized GSSG increased in elderly samples (1.34- and 6.96-fold,  
254 respectively). Myo-inositol becomes an important second messenger if  
255 phosphorylated, causing changes in  $[Ca^{2+}]$  (Berridge, 1993) (Berridge, 2016). In the  
256 correlation analysis, myo-inositol was not highly correlated with any other metabolite.  
257 Glycerophosphocholine and N-methyl-adenosine showed weak, negative  
258 correlations with myo-inositol (-0.47 and -0.43, respectively, **Supplemental Fig. S2**).  
259 Implications of the myo-inositol increase in elderly urine remain unclear. GSSG that  
260 we detected was the inactive, oxidized form. It increased in elderly urine. The active  
261 SH form of glutathione seems to be very unstable and it is difficult to prevent its  
262 degradation during preparation of urine as well as blood samples (Chaleckis et al.,

263 2016, the present study). The active SH form was rapidly oxidized to an inactive  
264 disulfide form, which accumulated in elderly subjects, whereas in young subjects the  
265 disulfide form was hardly formed or undetected possibly due to rapid decay in the  
266 young body or sample. Consistently, reduced GSSG was undetectable in urine of the  
267 five young subjects **Fig. 2D** and **Fig. 5B-F**). The abundance of GSSG was inversely  
268 related to those of pseudouridine, creatinine, and 2-hydroxybutyrate, which were  
269 most abundant in young subjects. Thus GSSG in urine appears to be appropriate as  
270 an age marker in urine of elderly subjects. In contrast, the high abundance of  
271 pseudouridine seems to be emblematic of youth.

272

### 273 **Highly correlated urine metabolites.**

274         Fifteen metabolites are highly correlated (correlation coefficients >0.85,  
275 **Fig. 2A, B**). They consisted of two subgroups. One comprised nucleosides  
276 pseudouridine, dimethyl guanosine, N-methyl guanosine and 2- or 3-hydroxybutyrate  
277 and the other group contained branched-chain amino acids and aromatic amino  
278 acids. Correlation within each group was high, but was not always high between the  
279 two subgroups (0.65 for pseudouridine and methionine, and 0.56 for glycerol  
280 phosphate and isoleucine; **Supplemental Fig. S2**). It remains to be determined what  
281 kind of functional distinctions exist between these two subgroups of metabolites in  
282 health and disease. In addition, a number of compounds showing correlation  
283 coefficients >0.70 are structurally only remotely related. Therefore, the high correlations  
284 of urinary compounds cannot all be easily explained. While isoleucine, leucine, and  
285 valine contain hydrophobic side chains, glutamine, having a hydrophilic sidechain,

286 showed correlation coefficients of 0.88-0.89 with isoleucine. Pseudouridine was highly  
287 correlated with 10 other compounds (>0.82), although we are unable to offer an  
288 explanation for this at present. The high correlation (0.83) between 2-hydroxybutyrate  
289 and 3-hydroxybutyrate may be explained by their structural relatedness, but their  
290 correlations in the range of 0.6-0.82 with 10 other compounds are difficult to explain.

291

### 292 **Thirteen metabolites linked by low correlation.**

293 Thirteen metabolites linked by low correlation coefficients are shown in  
294 **Supplemental Fig. S2**. They include myo-inositol, two regular amino acids  
295 (aspartate and lysine), methylated or acetylated amino acids, etc. Creatinine, an  
296 abundant aging marker (Kampmann et al., 1974) and an amino acid waste product in  
297 muscle (or other tissues) showed moderate correlations (**Fig. 2C**). Its urinary content  
298 decreased to 43% in elderly samples (**Table 1**). More than half (31) of the declining age  
299 markers in urine were amino acids (standard, methylated, acetylated, and other), and 6  
300 more are nucleosides, nucleobases, and their derivatives. Protein degradation and  
301 nucleic acid turnover seem to cause the change in elderly urine. Pseudouridine is a  
302 tRNA component (Charette and Gray, 2000), perhaps important in catabolism of  
303 nucleosides and other compounds, as it is highly correlated with purine nucleosides  
304 (adenosine, guanosine, and inosine), muscle amino acids (isoleucine, creatinine), and  
305 organic acids (hydroxybutyrates, glycerol-phosphate). Pseudouridine is also abundant  
306 in blood, but the amount in urine is 15-fold higher. Pseudouridine showed very high  
307 correlation coefficients with 10 compounds (**Fig. 2A, B**) and its high abundance in urine  
308 may provide a convenient youth marker.

309

310 **An effective overview on aging by heatmap.**

311 We showed that heatmap analysis of age-linked metabolites provides an  
312 effective overview of aging patterns using urinary metabolite profiles of individual  
313 subjects. Heatmap patterns are convenient for visualizing differences between young  
314 and aged subjects and also individual variations within and between groups (**Fig. 3**).  
315 PCA was useful to categorize a group of subjects because of its capacity to integrate a  
316 large collection of data about various metabolites. Elderly and young subjects were  
317 clearly separated into two populations, with two exceptions (**Fig. 4**). Exceptional  
318 individuals are of considerable interest, regarding their persistent youth or premature  
319 aging, if these truly represent metabolic features. Their individuality may be worthy of  
320 further investigation. Among 55 age-related urinary markers, 13 compounds did not  
321 show correlations  $>0.7$  (**Supplemental Fig. S1**). We determined the correlations of  
322 these 13 compounds with all metabolites. Age-related metabolites such as myo-inositol,  
323 S-adenosyl-homocysteine, N-methyl-adenosine, lysine, trimethyl-lysine, fructose-1,6-  
324 diphosphate, and glycerophosphocholine are only weakly correlated ( $\sim 0.6$ )  
325 (**Supplemental Fig. S2**). Thus, high correlation is not necessarily required of age-  
326 related compounds. These metabolites that are only remotely correlated are of interest  
327 to better understand the metabolic breadth of human aging.

328



329 **Table 1. List of 55 aging markers.**

330

| <i>Category</i> /Compound                                   | Peak abundance | Ratio (elderly/young) |
|-------------------------------------------------------------|----------------|-----------------------|
| <b><i>Nucleosides, nucleobases, and derivatives (6)</i></b> |                |                       |
| Dimethyl-guanosine                                          | H-M            | 0.63                  |
| N-Methyl-adenosine                                          | H-M            | 0.56                  |
| Pseudouridine                                               | H-M            | 0.45                  |
| N-Methyl-guanosine                                          | M              | 0.51                  |
| Adenosine                                                   | M-L            | 0.61                  |
| Hypoxanthine                                                | M-L            | 0.50                  |
| <b><i>Sugar derivatives (4)</i></b>                         |                |                       |
| Gluconate                                                   | H-M            | 0.67                  |
| N-Acetyl-glucosamine                                        | H-M            | 0.70                  |
| 1,5-Anhydroglucitol                                         | M-L            | 0.45                  |
| myo-Inositol                                                | M-L            | 1.34                  |
| <b><i>Sugar phosphates (5)</i></b>                          |                |                       |
| Glycerol-phosphate                                          | H-L            | 0.32                  |
| Fructose-1,6-diphosphate                                    | L              | 0.14                  |
| Fructose-6-phosphate                                        | L              | 0.33                  |
| Pentose-phosphate                                           | L              | 0.65                  |
| Phosphoglycerate                                            | L              | 0.46                  |
| <b><i>Choline and ethanolamine derivatives (2)</i></b>      |                |                       |
| Glycerophosphocholine                                       | M-L            | 0.50                  |
| Glycerophosphoethanolamine                                  | L              | 0.44                  |
| <b><i>Carnitines (4)</i></b>                                |                |                       |
| (iso)Butyryl-carnitine                                      | H-M            | 0.61                  |
| (iso)Valeryl-carnitine                                      | H-L            | 0.66                  |
| Decanoyl-carnitine                                          | M-L            | 0.49                  |
| Octanoyl-carnitine                                          | M-L            | 0.40                  |
| <b><i>Organic acids (2)</i></b>                             |                |                       |
| 2-Hydroxybutyrate                                           | M-L            | 0.33                  |
| 3-Hydroxybutyrate                                           | M-L            | 0.27                  |
| <b><i>Antioxidant (1)</i></b>                               |                |                       |
| Glutathione disulfide                                       | L              | 6.96                  |
| <b><i>Standard amino acids (13)</i></b>                     |                |                       |
| Histidine                                                   | H-M            | 0.68                  |
| Phenylalanine                                               | H-M            | 0.53                  |
| Tryptophan                                                  | H-M            | 0.49                  |
| Asparagine                                                  | M-L            | 0.73                  |
| Glutamine                                                   | M-L            | 0.46                  |
| Leucine                                                     | M-L            | 0.42                  |
| Lysine                                                      | M-L            | 0.50                  |
| Methionine                                                  | M-L            | 0.74                  |
| Serine                                                      | M-L            | 0.54                  |
| Threonine                                                   | M-L            | 0.71                  |
| Aspartate                                                   | L              | 0.62                  |
| Isoleucine                                                  | L              | 0.38                  |
| Valine                                                      | L              | 0.30                  |
| <b><i>Methylated amino acids (5)</i></b>                    |                |                       |
| Dimethyl-arginine                                           | H              | 0.69                  |
| N-Methyl-histidine                                          | H              | 0.64                  |
| Trimethyl-lysine                                            | H              | 0.74                  |
| Dimethyl-lysine                                             | H-M            | 0.52                  |
| Butyro-betaine                                              | M-L            | 0.76                  |

331 **Table 1. List of 55 aging markers. (continued)**

| <i>Category /Compound</i>         | Peak abundance | Ratio (elderly/young) |
|-----------------------------------|----------------|-----------------------|
| <b>Acetylated amino acids (4)</b> |                |                       |
| N-Acetyl-arginine                 | H-M            | 0.78                  |
| N2-Acetyl-lysine                  | M              | 0.62                  |
| N6-Acetyl-lysine                  | M              | 0.51                  |
| N-Acetyl-aspartate                | M-L            | 0.50                  |
| <b>Other amino acids (9)</b>      |                |                       |
| Creatinine                        | H              | 0.43                  |
| Indoxyl-sulfate                   | H              | 0.56                  |
| 4-Guanidinobutanoate              | H-M            | 0.46                  |
| Taurine                           | H-M            | 0.52                  |
| Carnosine                         | M-L            | 0.34                  |
| Keto(iso)leucine                  | M-L            | 0.36                  |
| Kynurenine                        | M-L            | 0.45                  |
| Quinolinic acid                   | M-L            | 0.44                  |
| S-Adenosyl-homocysteine           | L              | 0.75                  |

332

333 The list of 55 aging-linked compounds that showed a significant difference in  
334 abundance between young and elderly people. The abundance of compounds (peak  
335 area) displayed: H, high peak areas [ $>10^8$  AU (arbitrary unit)]; M, medium peak areas  
336 ( $10^8\sim 10^7$  AU); L, low peak areas ( $<10^7$  AU). The peak ratio was calculated using the  
337 median of peak abundance in elderly and young people, respectively.

338

## 339 **Materials and Methods**

### 340 **Participants and sample collection**

341 14 elderly (69~81 yr) and 13 young (25~38 yr) healthy people participated as  
342 subjects in this study (**Supplemental Table S1**). Measurements of metabolites in  
343 first morning urine are more consistent than random daytime sampling to monitor  
344 metabolites. Intra-individual coefficients of variation in first morning urine and 24-  
345 h collected urine are reportedly similar (Witte et al., 2009).

346 After collection, urine samples were brought to the laboratory within 3 hr 0.2  
347 mL urine were immediately quenched in 1.8 mL of 55% methanol at -40°C. This  
348 quenching step stabilizes metabolites and maximizes reproducibility of metabolomic  
349 data. Two internal standards (10 nmol of HEPES and PIPES) were added to each  
350 sample. After brief vortexing, samples were transferred to Amicon Ultra 10-kDa cut-  
351 off filters (Millipore, Billerica, MA, USA) to remove proteins and cellular debris. After  
352 sample concentration by vacuum evaporation, each sample was re-suspended in 40  
353 µL of 50% acetonitrile, and 1 µL was used for each injection into the LC-MS system,  
354 as described (Chaleckis et al., 2016) (Kameda et al., 2020).

355

### 356 **Ethics statement**

357 Written, informed consent was obtained from all donors, in accordance with the  
358 Declaration of Helsinki. All experiments were performed in compliance with relevant  
359 Japanese laws and institutional guidelines. All protocols were approved by the  
360 Human Subjects Research Review Committee of the Okinawa Institute of Science  
361 and Technology Graduate University (OIST).

362

## 363 **Chemicals and reagents**

364 Standards for metabolite identification were purchased from commercial sources as  
365 described previously (Pluskal et al., 2010b) (Chaleckis et al., 2014) (Chaleckis et al.,  
366 2016) (Teruya et al., 2019).

367

## 368 **LC-MS analysis and data processing**

369 Urinary metabolites were analyzed using an Ultimate 3000 DGP-3600RS HPLC  
370 system (Thermo Fisher Scientific, Waltham, MA, USA) coupled to an LTQ Orbitrap  
371 mass spectrometer (Thermo Fisher Scientific, Waltham, MA, USA), as described  
372 (Chaleckis et al., 2016) (Kameda et al., 2020). Briefly, LC separation was performed  
373 on a ZIC-pHILIC column (Merck SeQuant, Umea, Sweden; 150 mm x 2.1 mm, 5  $\mu$ m  
374 particle size). Acetonitrile (A) and 10 mM ammonium carbonate buffer, pH 9.3 (B)  
375 were used as the mobile phase, with a linear gradient elution from 80-20% A over 30  
376 min, at a flow rate of 100  $\mu$ L mL<sup>-1</sup>. The mass spectrometer was operated in full-scan  
377 mode with a 100-1000 m/z scan rate and automatic data-dependent MS/MS  
378 fragmentation scans. For each metabolite, we chose a singly charged, [M+H]<sup>+</sup> or [M-  
379 H]<sup>-</sup>, peak (**Supplemental Table S3**). Peak detection and identification of metabolites  
380 were performed using MZmine 2 software (Pluskal et al., 2010a). Detailed data  
381 analytical procedures and parameters have been described previously (Teruya et al.,  
382 2019).

383

## 384 **Peak identification and characteristics**

385 We analyzed 99 urine metabolites that were confirmed using standards or MS/MS

386 analysis (Pluskal et al., 2010b) (Chaleckis et al., 2014) (Chaleckis et al., 2016)  
387 (Teruya et al., 2019). Metabolites were classified into 3 groups (H, M, and L),  
388 according to their peak areas. H denotes compounds with high peak areas ( $>10^8$   
389 AU), M with medium peak areas ( $10^7 \sim 10^8$  AU) and L with low peak areas ( $<10^7$  AU)  
390 (**Supplemental Table S2**).

391

### 392 **Statistical analysis**

393 A non-parametric Mann–Whitney test was used to compare young and elderly  
394 subjects. Statistical significance was established at  $p < 0.05$ . Data were exported into  
395 a spreadsheet and dot plots were drawn using R statistical software ([http://www.r-](http://www.r-project.org)  
396 [project.org](http://www.r-project.org)). Correlation coefficients were determined for identification of metabolic  
397 networks among compounds. Principal component analysis (PCA) was conducted  
398 using SIMCA-P+ software (Umetrics Inc., Umea, Sweden). Pearson's correlation  
399 coefficients among metabolites were calculated using Microsoft Excel.

400

### 401 **Data availability**

402 Raw LC-MS data in mzML format are accessible via the MetaboLights repository  
403 (URL: <http://www.ebi.ac.uk/metabolights>). Data for the 27 volunteers are available  
404 under accession number MTBLS1407.

405

406

### 407 **Acknowledgments**

408 We thank Ms. Junko Takada for providing excellent technical assistance. We

409 gratefully acknowledge the editorial help of Dr. Steven D. Aird. We are greatly  
410 indebted to the generous support of Okinawa Institute of Science and Technology  
411 Graduate University and its Innovative Technology Research (ITR) fund.

412

413

414 **Declaration of Interests**

415 The authors declare that they have no competing interests.

416

417 **References**

- 418 Ames, B.N. (1989). Endogenous DNA damage as related to cancer and aging.  
419 Mutation Research/Fundamental and Molecular Mechanisms of Mutagenesis 214,  
420 41-46.
- 421 Auro, K., Joensuu, A., Fischer, K., Kettunen, J., Salo, P., Mattsson, H., Niironen, M.,  
422 Kaprio, J., Eriksson, J.G., Lehtimäki, T., et al. (2014). A metabolic view on  
423 menopause and ageing. Nat Commun 5, 4708.
- 424 Baxmann, A.C., Ahmed, M.S., Marques, N.C., Menon, V.B., Pereira, A.B., Kirsztajn,  
425 G.M., and Heilberg, I.P. (2008). Influence of muscle mass and physical activity on  
426 serum and urinary creatinine and serum cystatin C. Clin J Am Soc Nephrol 3, 348-  
427 354.
- 428 Berridge, M.J. (1993). Inositol trisphosphate and calcium signalling. Nature 361, 315-  
429 325.
- 430 Berridge, M.J. (2016). The Inositol Trisphosphate/Calcium Signaling Pathway in  
431 Health and Disease. Physiol Rev 96, 1261-1296.
- 432 Chak, C.M., Lacruz, M.E., Adam, J., Brandmaier, S., Covic, M., Huang, J., Meisinger,  
433 C., Tiller, D., Prehn, C., Adamski, J., et al. (2019). Ageing Investigation Using Two-  
434 Time-Point Metabolomics Data from KORA and CARLA Studies. Metabolites 9.
- 435 Chaleckis, R., Ebe, M., Pluskal, T., Murakami, I., Kondoh, H., and Yanagida, M.  
436 (2014). Unexpected similarities between the Schizosaccharomyces and human  
437 blood metabolomes, and novel human metabolites. Mol Biosyst 10, 2538-2551.
- 438 Chaleckis, R., Murakami, I., Takada, J., Kondoh, H., and Yanagida, M. (2016).  
439 Individual variability in human blood metabolites identifies age-related differences.  
440 Proc Natl Acad Sci U S A 113, 4252-4259.
- 441 Charette, M., and Gray, M.W. (2000). Pseudouridine in RNA: what, where, how, and  
442 why. IUBMB Life 49, 341-351.
- 443 Eknoyan, G., Hostetter, T., Bakris, G.L., Hebert, L., Levey, A.S., Parving, H.-H.,  
444 Steffes, M.W., and Toto, R. (2003). Proteinuria and other markers of chronic kidney  
445 disease: a position statement of the national kidney foundation (NKF) and the

- 446 national institute of diabetes and digestive and kidney diseases (NIDDK). American  
447 Journal of Kidney Diseases 42, 617-622.
- 448 Gonzalez-Covarrubias, V., Beekman, M., Uh, H.W., Dane, A., Troost, J.,  
449 Paliukhovich, I., van der Kloet, F.M., Houwing-Duistermaat, J., Vreeken, R.J.,  
450 Hankemeier, T., et al. (2013). Lipidomics of familial longevity. *Aging Cell* 12, 426-434.
- 451 Han, W.K., Bailly, V., Abichandani, R., Thadhani, R., and Bonventre, J.V. (2002).  
452 Kidney Injury Molecule-1 (KIM-1): a novel biomarker for human renal proximal tubule  
453 injury. *Kidney Int* 62, 237-244.
- 454 Hertel, J., Friedrich, N., Wittfeld, K., Pietzner, M., Budde, K., Van der Auwera, S.,  
455 Lohmann, T., Teumer, A., Volzke, H., Nauck, M., et al. (2016). Measuring Biological  
456 Age via Metabonomics: The Metabolic Age Score. *J Proteome Res* 15, 400-410.
- 457 Heymsfield, S.B., Arteaga, C., McManus, C., Smith, J., and Moffitt, S. (1983).  
458 Measurement of muscle mass in humans: validity of the 24-hour urinary creatinine  
459 method. *Am J Clin Nutr* 37, 478-494.
- 460 Hughes, V.A., Frontera, W.R., Roubenoff, R., Evans, W.J., and Singh, M.A. (2002).  
461 Longitudinal changes in body composition in older men and women: role of body  
462 weight change and physical activity. *Am J Clin Nutr* 76, 473-481.
- 463 Jove, M., Mate, I., Naudi, A., Mota-Martorell, N., Portero-Otin, M., De la Fuente, M.,  
464 and Pamplona, R. (2016). Human Aging Is a Metabolome-related Matter of Gender.  
465 *J Gerontol A Biol Sci Med Sci* 71, 578-585.
- 466 Kameda, M., Teruya, T., Yanagida, M., and Kondoh, H. (2020). Frailty markers  
467 comprise blood metabolites involved in antioxidation, cognition, and mobility. *Proc*  
468 *Natl Acad Sci U S A*.
- 469 Kampmann, J., Siersbaek-Nielsen, K., Kristensen, M., and Hansen, J.M. (1974).  
470 Rapid evaluation of creatinine clearance. *Acta Med Scand* 196, 517-520.
- 471 Lawton, K.A., Berger, A., Mitchell, M., Milgram, K.E., Evans, A.M., Guo, L., Hanson,  
472 R.W., Kalhan, S.C., Ryals, J.A., and Milburn, M.V. (2008). Analysis of the adult  
473 human plasma metabolome. *Pharmacogenomics* 9, 383-397.
- 474 Maynard, S., Fang, E.F., Scheibye-Knudsen, M., Croteau, D.L., and Bohr, V.A.



- 475 (2015). DNA Damage, DNA Repair, Aging, and Neurodegeneration. Cold Spring  
476 Harb Perspect Med 5.
- 477 Menni, C., Kastenmuller, G., Petersen, A.K., Bell, J.T., Psatha, M., Tsai, P.C., Gieger,  
478 C., Schulz, H., Erte, I., John, S., et al. (2013). Metabolomic markers reveal novel  
479 pathways of ageing and early development in human populations. *Int J Epidemiol* 42,  
480 1111-1119.
- 481 Mishra, J., Dent, C., Tarabishi, R., Mitsnefes, M.M., Ma, Q., Kelly, C., Ruff, S.M.,  
482 Zahedi, K., Shao, M., Bean, J., et al. (2005). Neutrophil gelatinase-associated  
483 lipocalin (NGAL) as a biomarker for acute renal injury after cardiac surgery. *The*  
484 *Lancet* 365, 1231-1238.
- 485 Mishur, R.J., and Rea, S.L. (2012). Applications of mass spectrometry to  
486 metabolomics and metabonomics: detection of biomarkers of aging and of age-  
487 related diseases. *Mass Spectrom Rev* 31, 70-95.
- 488 Nakamura, E., Miyao, K., and Ozeki, T. (1988). Assessment of biological age by  
489 principal component analysis. *Mechanisms of Ageing and Development* 46, 1-18.
- 490 Parikh, C.R., Mishra, J., Thiessen-Philbrook, H., Dursun, B., Ma, Q., Kelly, C., Dent,  
491 C., Devarajan, P., and Edelstein, C.L. (2006). Urinary IL-18 is an early predictive  
492 biomarker of acute kidney injury after cardiac surgery. *Kidney Int* 70, 199-203.
- 493 Pisitkun, T., Johnstone, R., and Knepper, M.A. (2006). Discovery of urinary  
494 biomarkers. *Mol Cell Proteomics* 5, 1760-1771.
- 495 Pluskal, T., Castillo, S., Villar-Briones, A., and Oresic, M. (2010a). MZmine 2:  
496 modular framework for processing, visualizing, and analyzing mass spectrometry-  
497 based molecular profile data. *BMC Bioinformatics* 11, 395.
- 498 Pluskal, T., Nakamura, T., Villar-Briones, A., and Yanagida, M. (2010b). Metabolic  
499 profiling of the fission yeast *S. pombe*: quantification of compounds under different  
500 temperatures and genetic perturbation. *Mol Biosyst* 6, 182-198.
- 501 Pluskal, T., Nakamura, T., and Yanagida, M. (2016). Preparation of Intracellular  
502 Metabolite Extracts from Liquid *Schizosaccharomyces pombe* Cultures. *Cold Spring*  
503 *Harb Protoc* 2016.

- 504 Pluskal, T., Uehara, T., and Yanagida, M. (2012). Highly accurate chemical formula  
505 prediction tool utilizing high-resolution mass spectra, MS/MS fragmentation, heuristic  
506 rules, and isotope pattern matching. *Anal Chem* *84*, 4396-4403.
- 507 Pluskal, T., and Yanagida, M. (2016a). Measurement of Metabolome Samples Using  
508 Liquid Chromatography-Mass Spectrometry, Data Acquisition, and Processing. *Cold*  
509 *Spring Harb Protoc* *2016*.
- 510 Pluskal, T., and Yanagida, M. (2016b). Metabolomic Analysis of  
511 *Schizosaccharomyces pombe*: Sample Preparation, Detection, and Data  
512 Interpretation. *Cold Spring Harb Protoc* *2016*.
- 513 Pollack, M., Phaneuf, S., Dirks, A., and Leeuwenburgh, C. (2002). The role of  
514 apoptosis in the normal aging brain, skeletal muscle, and heart. *Ann N Y Acad Sci*  
515 *959*, 93-107.
- 516 Rist, M.J., Roth, A., Frommherz, L., Weinert, C.H., Kruger, R., Merz, B., Bunzel, D.,  
517 Mack, C., Egert, B., Bub, A., et al. (2017). Metabolite patterns predicting sex and age  
518 in participants of the Karlsruhe Metabolomics and Nutrition (KarMeN) study. *PLoS*  
519 *One* *12*, e0183228.
- 520 Short, K.R., Bigelow, M.L., Kahl, J., Singh, R., Coenen-Schimke, J., Raghavakaimal,  
521 S., and Nair, K.S. (2005). Decline in skeletal muscle mitochondrial function with  
522 aging in humans. *Proc Natl Acad Sci U S A* *102*, 5618-5623.
- 523 Slupsky, C.M., Rankin, K.N., Wagner, J., Fu, H., Chang, D., Weljie, A.M., Saude,  
524 E.J., Lix, B., Adamko, D.J., Shah, S., et al. (2007). Investigations of the effects of  
525 gender, diurnal variation, and age in human urinary metabolomic profiles. *Anal Chem*  
526 *79*, 6995-7004.
- 527 Teruya, T., Chaleckis, R., Takada, J., Yanagida, M., and Kondoh, H. (2019). Diverse  
528 metabolic reactions activated during 58-hr fasting are revealed by non-targeted  
529 metabolomic analysis of human blood. *Sci Rep* *9*, 854.
- 530 Thevenot, E.A., Roux, A., Xu, Y., Ezan, E., and Junot, C. (2015). Analysis of the  
531 Human Adult Urinary Metabolome Variations with Age, Body Mass Index, and  
532 Gender by Implementing a Comprehensive Workflow for Univariate and OPLS  
533 Statistical Analyses. *J Proteome Res* *14*, 3322-3335.

534 Vaidya, V.S., Waikar, S.S., Ferguson, M.A., Collings, F.B., Sunderland, K., Gioules,  
535 C., Bradwin, G., Matsouaka, R., Betensky, R.A., Curhan, G.C., et al. (2008). Urinary  
536 biomarkers for sensitive and specific detection of acute kidney injury in humans. *Clin*  
537 *Transl Sci* 1, 200-208.

538 Witte, E.C., Lambers Heerspink, H.J., de Zeeuw, D., Bakker, S.J., de Jong, P.E., and  
539 Gansevoort, R. (2009). First morning voids are more reliable than spot urine samples  
540 to assess microalbuminuria. *J Am Soc Nephrol* 20, 436-443.

541 Yu, Z., Zhai, G., Singmann, P., He, Y., Xu, T., Prehn, C., Romisch-Margl, W., Lattka,  
542 E., Gieger, C., Soranzo, N., et al. (2012). Human serum metabolic profiles are age  
543 dependent. *Aging Cell* 11, 960-967.

544

545

## 546 **Figure Legends**

547 **Figure 1.** Dot plots of 55 compounds that showed significant differences in  
548 abundance between elderly and young people. Distributions of 11 subgroups of 55  
549 metabolites in urine samples from 27 individuals. Pale red and azure dots represent  
550 elderly and young subjects, respectively. Bars represent medians in each group. The  
551 ratio of median value between elderly and young is shown in **Table 1**. P-values were  
552 obtained using the non-parametric Mann Whitney U test. Fifty-three of 55  
553 compounds were more abundant in young subjects, while two (myo-inositol and  
554 GSSG) were more abundant among the elderly.

555

556 **Figure 2.** Correlation network among age-linked compounds. (A) Values indicate  
557 correlation coefficients between paired compounds. Highly correlated pairs of aging  
558 markers ( $r > 0.85$ ) are indicated with red circles. The most highly correlated pairs are  
559 indicated by green (0.92) and red arrows (0.91). (B) Interrelated compounds form a  
560 network. Correlations ( $r > 0.90$ ) are highlighted in yellow. (C) Fifteen metabolites with  
561 the highest correlation with creatinine are listed. (D) Scatter plot of the peak  
562 abundance ( $\times 10^6$  AU) between creatinine and GSSG. GSSG was negatively  
563 correlated with creatinine.

564

565 **Figure 3.** Heatmap representing urinary metabolic profiles of elderly and young  
566 subjects. Standardized data for each metabolite are shown for 27 subjects using a  
567 color matrix representing relative abundance data of 55 urinary aging markers.  
568 Numerical values indicate the t-score, a kind of standardized score. The mean and

569 standard deviation are 50 and 10, respectively. Color intensity of the cells reflects the  
570 t-score, indicating levels higher than average.

571

572 **Figure 4.** PCA of 55 aging markers. (A) Thirteen young and 14 elderly subjects are  
573 shown in blue and red, respectively, with their subject numbers (corresponding to  
574 **Fig. 3**). PC2 comprised metabolites that were not strongly correlated  
575 (glycerophosphocholine, S-adenosyl-homocysteine, etc.), but that were isolated from  
576 a strong correlation network. (B) PC1 score of each subject (X-axis) is plotted versus  
577 subject age (Y-axis). The correlation coefficient is shown in the box.

578

579 **Figure 5.** Scatter plots between GSSG and correlated compounds or age.

580 (A) Ten metabolites with the highest correlations with GSSG are listed. Scatter plot of  
581 the peak abundance ( $\times 10^6$  AU) between GSSG and N-acetyl aspartate (B), N-methyl  
582 guanosine (C), dimethyl guanosine (D), pseudouridine (E), and the age of the  
583 subject (F).

584

585

# Figure 1.

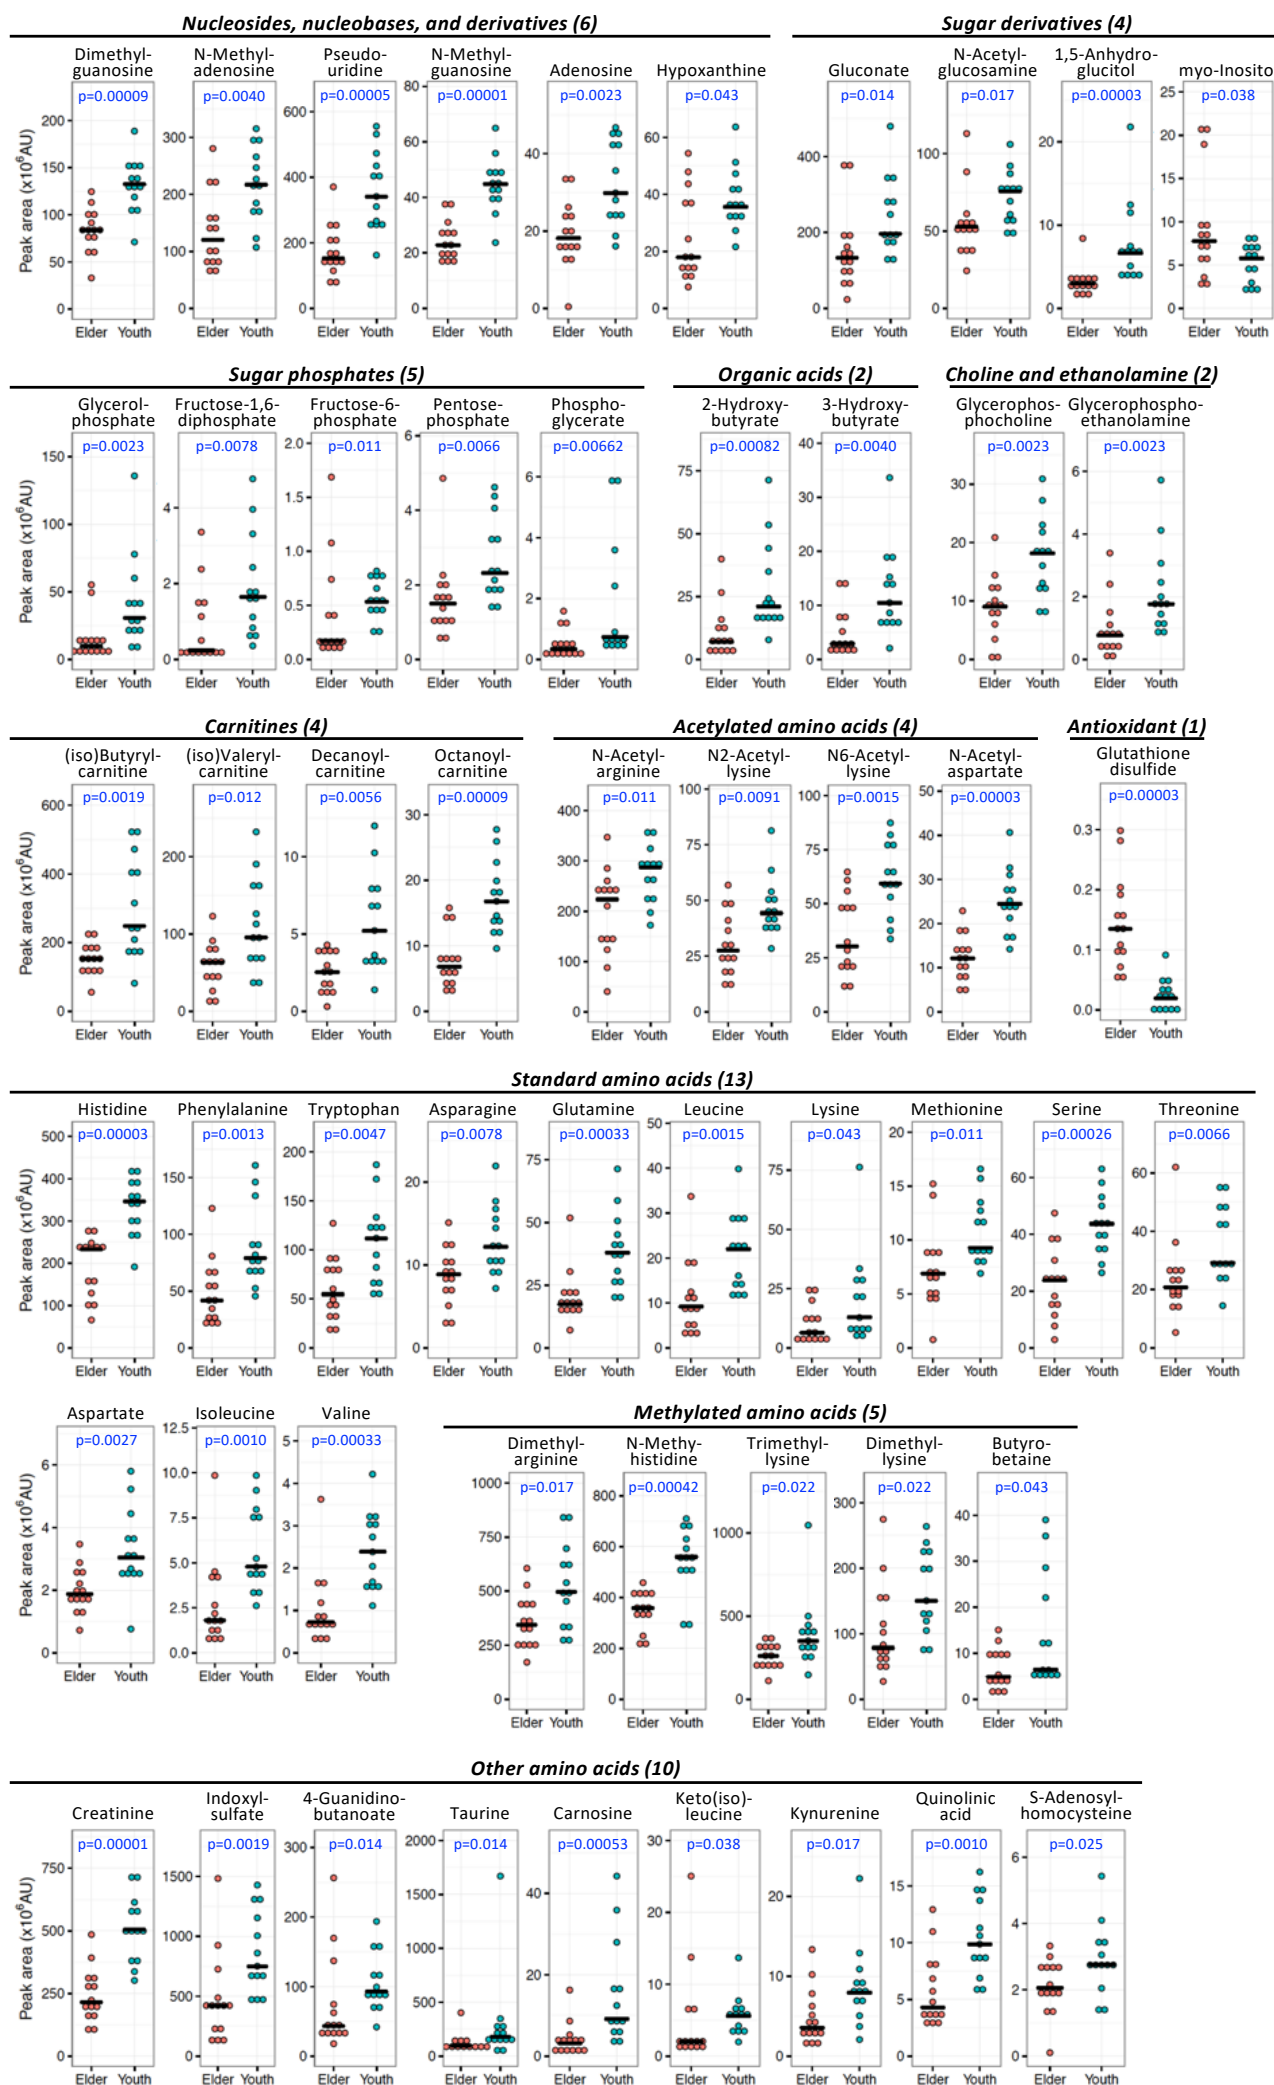

## Figure 2.

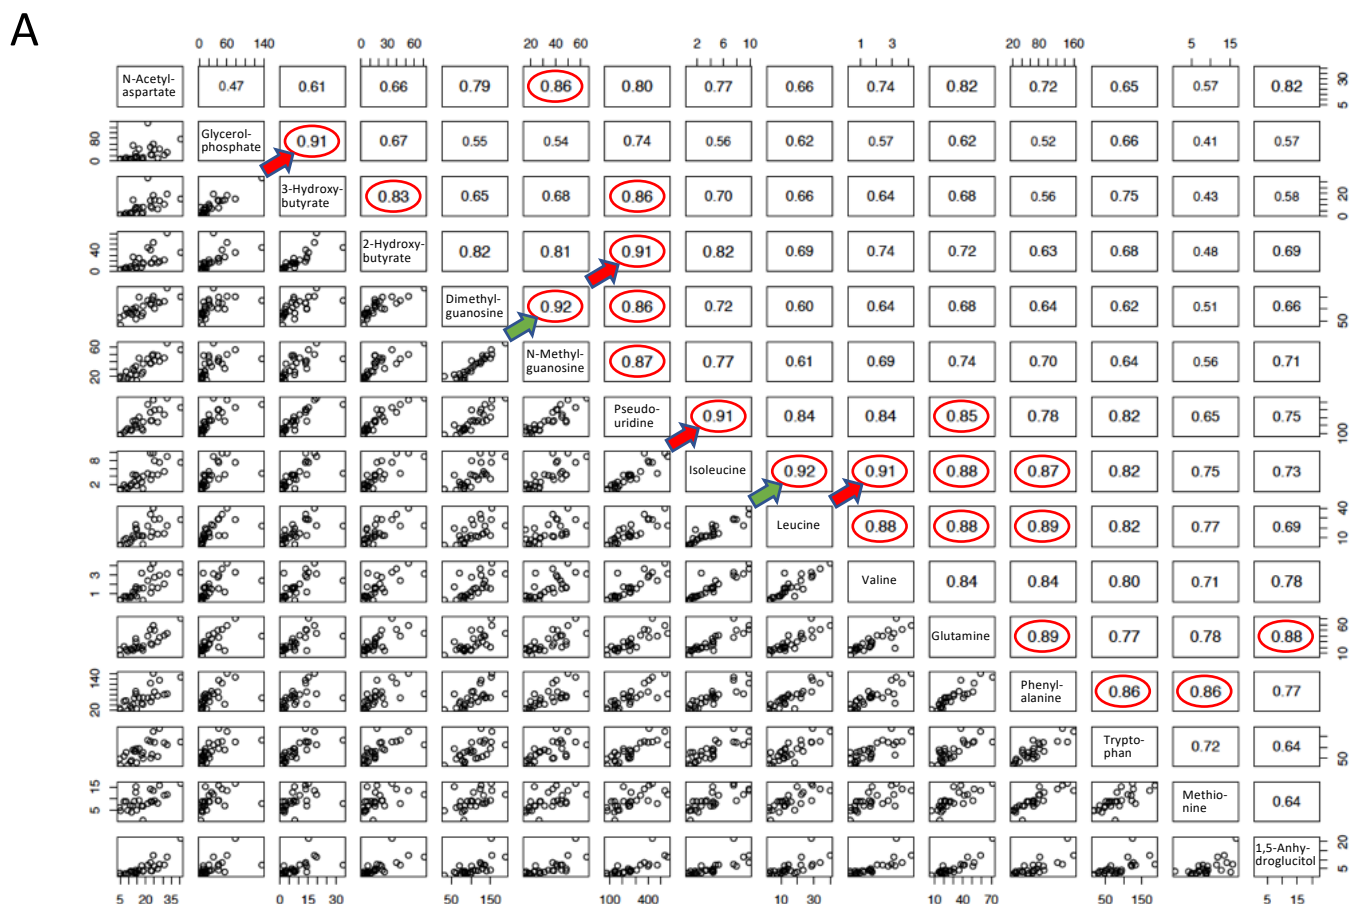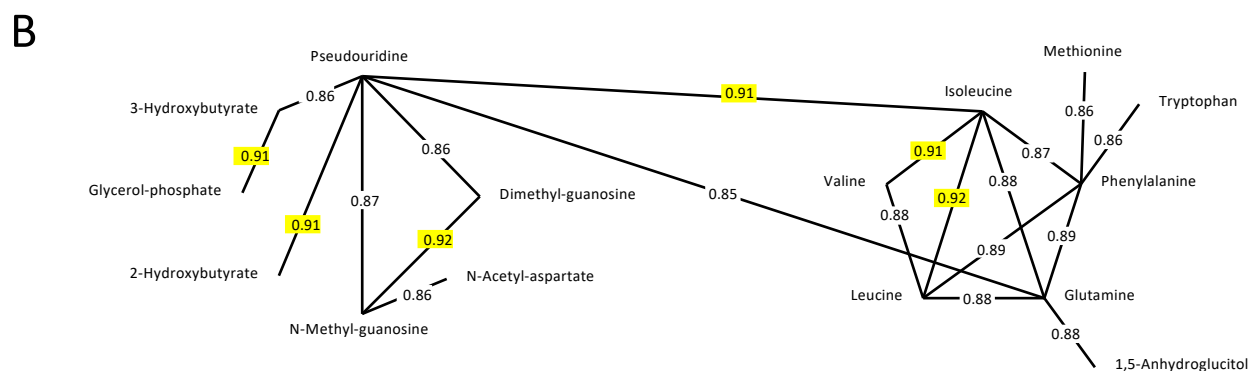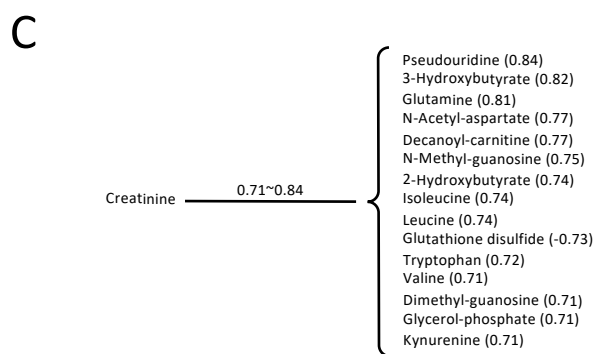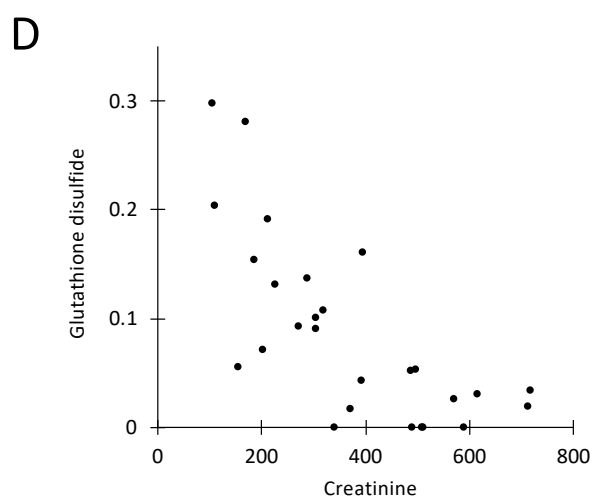



# Figure 3.

| Category                 | Subject No. Age/Gender     | 1    | 2    | 3    | 4    | 5    | 6    | 7    | 8    | 9    | 10   | 11   | 12   | 13   | 14   | 15   | 16   | 17   | 18   | 19   | 20   | 21   | 22   | 23   | 24   | 25   | 26   | 27   |
|--------------------------|----------------------------|------|------|------|------|------|------|------|------|------|------|------|------|------|------|------|------|------|------|------|------|------|------|------|------|------|------|------|
|                          |                            | 75M  | 79M  | 78M  | 69F  | 78F  | 70F  | 69F  | 77F  | 74F  | 76F  | 81F  | 80F  | 80F  | 75F  | 33M  | 38M  | 29M  | 30M  | 30M  | 34M  | 30M  | 33F  | 29F  | 31F  | 29F  | 25F  | 27F  |
| Antioxidant              | Glutathione disulfide ↑    | 75.1 | 73.0 | 52.5 | 62.4 | 51.6 | 56.0 | 63.8 | 55.2 | 57.9 | 46.3 | 45.9 | 48.1 | 58.7 | 50.7 | 50.5 | 41.9 | 46.0 | 42.8 | 39.6 | 43.8 | 43.3 | 39.6 | 44.8 | 41.6 | 39.6 | 39.6 |      |
| Sugar derivative         | myo-Inositol ↑             | 54.5 | 42.6 | 52.8 | 40.5 | 49.1 | 72.6 | 41.6 | 75.7 | 50.0 | 47.4 | 51.5 | 54.2 | 76.1 | 46.1 | 39.4 | 52.0 | 40.4 | 41.3 | 50.6 | 44.7 | 46.9 | 49.0 | 44.3 | 48.6 | 48.1 | 50.1 | 40.0 |
| Nucleosides, nucleobases | Dimethyl-guanosine         | 37.6 | 40.6 | 48.1 | 42.0 | 45.7 | 36.2 | 29.0 | 43.5 | 48.3 | 51.8 | 55.0 | 43.9 | 43.2 | 43.5 | 39.9 | 63.4 | 50.1 | 57.3 | 73.2 | 58.4 | 48.7 | 59.6 | 62.4 | 55.6 | 56.6 | 62.9 | 53.4 |
|                          | N-Methyl-adenosine         | 36.4 | 56.3 | 39.6 | 55.8 | 37.7 | 41.2 | 44.8 | 37.8 | 35.3 | 48.1 | 63.6 | 38.1 | 47.5 | 46.2 | 55.4 | 55.1 | 51.2 | 56.7 | 61.8 | 43.2 | 68.1 | 59.2 | 64.9 | 48.9 | 49.9 | 41.1 | 66.2 |
|                          | Pseudouridine              | 36.2 | 39.0 | 49.6 | 40.7 | 46.0 | 45.9 | 36.6 | 42.4 | 40.7 | 48.9 | 58.0 | 41.2 | 40.9 | 43.4 | 42.5 | 69.8 | 50.2 | 55.8 | 71.5 | 65.5 | 60.1 | 50.1 | 53.5 | 60.7 | 48.6 | 62.6 | 49.9 |
|                          | N-Methyl-guanosine         | 38.1 | 39.2 | 47.6 | 36.5 | 45.3 | 41.5 | 39.9 | 38.2 | 44.8 | 52.4 | 52.6 | 41.6 | 44.3 | 36.1 | 42.2 | 61.7 | 50.0 | 58.3 | 73.1 | 57.3 | 55.5 | 60.6 | 58.1 | 54.8 | 60.7 | 66.4 | 53.3 |
|                          | Adenosine                  | 38.4 | 41.7 | 41.4 | 41.5 | 50.4 | 42.1 | 39.5 | 45.2 | 49.2 | 56.5 | 56.8 | 45.1 | 28.5 | 47.8 | 41.8 | 67.2 | 48.1 | 66.0 | 51.9 | 49.0 | 49.4 | 63.4 | 58.5 | 68.0 | 44.1 | 64.9 | 53.6 |
| Hydroxanthine            | 37.1                       | 38.2 | 61.0 | 40.9 | 54.2 | 35.7 | 53.1 | 40.9 | 45.2 | 58.1 | 65.3 | 37.7 | 39.0 | 33.9 | 43.4 | 52.6 | 50.2 | 53.9 | 57.3 | 56.5 | 52.7 | 71.4 | 63.1 | 47.2 | 60.5 | 51.3 | 49.7 |      |
| Sugar derivatives        | Gluconate                  | 37.7 | 43.3 | 50.3 | 34.2 | 41.5 | 48.7 | 38.3 | 45.4 | 40.1 | 66.4 | 66.0 | 43.1 | 44.9 | 46.7 | 44.3 | 75.5 | 43.3 | 48.5 | 63.5 | 57.2 | 54.5 | 49.3 | 49.9 | 49.8 | 57.6 | 62.8 | 47.2 |
|                          | N-Acetyl-glucosamine       | 37.9 | 45.1 | 43.9 | 45.3 | 49.1 | 32.0 | 43.4 | 47.3 | 45.6 | 61.7 | 73.2 | 45.9 | 37.0 | 39.0 | 42.4 | 48.9 | 44.3 | 57.3 | 63.4 | 47.6 | 70.0 | 55.9 | 55.8 | 52.8 | 46.6 | 61.1 | 57.4 |
|                          | 1,5-Anhydroglucitol        | 43.4 | 42.2 | 44.8 | 45.2 | 43.8 | 44.7 | 40.4 | 41.8 | 42.7 | 46.8 | 56.9 | 45.7 | 45.5 | 43.5 | 52.8 | 66.3 | 47.1 | 54.1 | 64.1 | 53.8 | 52.3 | 46.0 | 47.3 | 54.7 | 49.2 | 88.1 | 46.5 |
| Sugar phosphates         | Glycerol-phosphate         | 42.1 | 42.7 | 59.4 | 42.9 | 44.6 | 45.1 | 42.7 | 42.4 | 44.4 | 44.7 | 57.4 | 43.3 | 41.7 | 45.9 | 43.5 | 61.1 | 49.6 | 47.7 | 51.0 | 86.9 | 54.3 | 47.6 | 54.9 | 55.0 | 43.8 | 67.1 | 48.2 |
|                          | Fructose-1,6-diphosphate   | 41.1 | 41.3 | 43.3 | 40.8 | 40.5 | 51.6 | 41.4 | 40.9 | 40.4 | 50.6 | 65.5 | 40.6 | 48.3 | 57.9 | 48.2 | 70.2 | 65.1 | 46.0 | 58.3 | 53.4 | 42.3 | 53.1 | 76.5 | 44.5 | 51.6 | 52.3 | 44.3 |
|                          | Fructose-6-phosphate       | 41.1 | 41.8 | 66.4 | 39.8 | 41.8 | 47.7 | 40.0 | 39.0 | 41.1 | 48.5 | 83.1 | 41.6 | 57.2 | 40.7 | 43.3 | 58.7 | 51.5 | 49.9 | 55.0 | 44.8 | 58.6 | 57.4 | 59.3 | 51.3 | 48.9 | 52.5 | 49.2 |
|                          | Inositol-phosphate         | 36.6 | 39.9 | 51.1 | 37.1 | 48.4 | 41.6 | 41.1 | 45.7 | 46.2 | 49.2 | 72.9 | 46.3 | 41.4 | 43.7 | 43.2 | 58.9 | 49.9 | 51.6 | 68.8 | 68.1 | 52.3 | 47.4 | 70.8 | 48.1 | 47.7 | 59.3 | 44.5 |
| Phosphoglycerate         | 43.8                       | 43.6 | 49.7 | 44.3 | 45.5 | 45.8 | 44.3 | 43.6 | 44.1 | 46.4 | 50.9 | 44.2 | 52.9 | 45.8 | 44.9 | 80.5 | 47.1 | 48.4 | 46.4 | 58.2 | 47.4 | 47.5 | 46.4 | 65.8 | 46.6 | 80.2 | 45.7 |      |
| Cholines, ethanolamines  | Glycerophosphocholine      | 44.5 | 51.8 | 60.4 | 42.5 | 44.9 | 40.6 | 45.6 | 37.3 | 49.6 | 48.3 | 32.9 | 46.1 | 33.6 | 44.0 | 50.1 | 43.1 | 49.6 | 63.3 | 73.8 | 54.0 | 61.6 | 56.8 | 68.8 | 44.1 | 57.6 | 68.1 | 57.0 |
|                          | Glycerophosphoethanolamine | 39.4 | 41.1 | 56.6 | 40.9 | 44.5 | 44.6 | 41.2 | 46.6 | 49.7 | 41.9 | 64.1 | 43.9 | 38.8 | 45.0 | 44.2 | 46.7 | 45.5 | 51.8 | 51.1 | 61.7 | 49.3 | 56.9 | 81.9 | 52.5 | 47.1 | 69.6 | 53.5 |
| Carnitines               | (iso)Butyryl-carnitine     | 41.9 | 47.3 | 46.4 | 43.7 | 46.9 | 41.8 | 41.6 | 45.2 | 50.2 | 49.7 | 41.6 | 44.0 | 44.9 | 37.0 | 48.7 | 56.9 | 50.7 | 73.1 | 45.3 | 51.8 | 63.1 | 46.9 | 39.0 | 72.6 | 46.2 | 68.9 | 64.4 |
|                          | (iso)Valeryl-carnitine     | 49.4 | 47.0 | 57.2 | 37.4 | 43.4 | 39.0 | 45.5 | 46.7 | 49.1 | 42.4 | 41.8 | 46.6 | 51.2 | 35.8 | 52.1 | 47.7 | 55.3 | 64.4 | 57.7 | 51.7 | 77.5 | 41.2 | 41.0 | 64.7 | 47.9 | 69.7 | 46.3 |
|                          | Decanoyl-carnitine         | 48.8 | 42.2 | 49.3 | 40.2 | 44.8 | 39.4 | 41.5 | 44.4 | 40.5 | 50.8 | 48.7 | 46.1 | 50.0 | 36.8 | 40.6 | 59.0 | 47.1 | 63.0 | 64.0 | 77.6 | 71.6 | 46.6 | 47.2 | 53.9 | 47.5 | 60.1 | 48.4 |
|                          | Octanoyl-carnitine         | 53.5 | 43.9 | 52.1 | 38.1 | 38.1 | 36.3 | 40.4 | 40.2 | 44.4 | 54.9 | 42.8 | 40.8 | 44.1 | 36.6 | 52.6 | 58.6 | 45.8 | 50.0 | 65.2 | 72.6 | 58.4 | 51.3 | 61.0 | 69.8 | 48.8 | 56.5 | 53.2 |
| Organic acids            | 2-Hydroxybutyrate          | 40.1 | 41.4 | 54.4 | 40.9 | 45.5 | 42.7 | 40.6 | 41.3 | 42.9 | 48.0 | 62.4 | 43.6 | 46.8 | 42.3 | 43.2 | 70.4 | 48.3 | 51.2 | 81.0 | 64.9 | 52.5 | 47.9 | 53.0 | 49.4 | 48.1 | 59.4 | 47.7 |
|                          | 3-Hydroxybutyrate          | 40.2 | 40.4 | 57.7 | 41.8 | 45.4 | 48.9 | 40.4 | 40.0 | 42.2 | 42.8 | 56.9 | 42.7 | 49.1 | 41.9 | 41.3 | 63.1 | 47.6 | 52.6 | 64.6 | 83.5 | 57.6 | 48.4 | 48.4 | 56.6 | 46.9 | 58.9 | 50.1 |
| Standard amino acids     | Histidine                  | 48.3 | 51.5 | 46.9 | 39.8 | 48.7 | 47.7 | 33.5 | 30.3 | 48.0 | 36.7 | 51.5 | 34.0 | 48.6 | 39.1 | 50.7 | 42.9 | 50.2 | 59.4 | 60.1 | 58.7 | 65.4 | 53.9 | 53.9 | 63.8 | 62.5 | 66.3 | 57.5 |
|                          | Phenylalanine              | 39.2 | 46.1 | 43.1 | 38.9 | 49.2 | 53.4 | 37.6 | 36.9 | 46.8 | 49.8 | 64.5 | 41.1 | 43.0 | 38.5 | 44.1 | 74.5 | 56.2 | 52.9 | 53.6 | 49.5 | 55.8 | 50.1 | 49.8 | 67.5 | 51.7 | 70.6 | 45.9 |
|                          | Tryptophan                 | 41.8 | 44.8 | 51.3 | 40.3 | 49.8 | 52.5 | 35.2 | 35.4 | 48.7 | 42.3 | 60.2 | 38.9 | 48.7 | 38.0 | 45.9 | 70.5 | 49.8 | 58.8 | 56.6 | 61.5 | 59.1 | 46.4 | 52.7 | 73.8 | 44.4 | 59.6 | 42.8 |
|                          | Asparagine                 | 44.0 | 49.0 | 45.2 | 37.1 | 49.3 | 60.2 | 31.5 | 33.1 | 54.6 | 46.4 | 53.4 | 41.9 | 46.7 | 40.9 | 42.0 | 66.1 | 45.6 | 50.3 | 58.6 | 48.7 | 53.4 | 53.9 | 47.1 | 75.8 | 61.1 | 63.9 | 50.1 |
|                          | Glutamine                  | 41.8 | 45.5 | 40.9 | 42.2 | 44.7 | 50.6 | 35.8 | 40.1 | 42.2 | 46.0 | 64.3 | 42.7 | 41.3 | 43.4 | 43.5 | 68.7 | 54.2 | 57.8 | 60.0 | 57.1 | 63.6 | 47.5 | 44.7 | 55.5 | 50.7 | 76.7 | 48.7 |
|                          | Leucine                    | 36.8 | 42.1 | 46.7 | 43.0 | 44.6 | 54.0 | 36.8 | 38.6 | 43.6 | 46.0 | 68.2 | 39.8 | 37.7 | 52.5 | 46.3 | 74.4 | 57.7 | 48.7 | 56.7 | 56.3 | 63.0 | 50.3 | 46.6 | 63.5 | 48.1 | 62.8 | 45.3 |
|                          | Lysine                     | 49.2 | 53.4 | 47.3 | 42.0 | 56.1 | 47.2 | 42.3 | 43.3 | 43.3 | 42.5 | 56.0 | 44.3 | 44.5 | 43.1 | 46.3 | 62.1 | 90.0 | 45.3 | 44.7 | 54.7 | 48.6 | 44.5 | 54.0 | 59.1 | 42.7 | 58.7 | 44.7 |
|                          | Methionine                 | 42.7 | 49.4 | 44.7 | 37.5 | 49.6 | 66.1 | 39.1 | 39.5 | 49.5 | 44.3 | 63.4 | 44.9 | 28.4 | 39.8 | 44.5 | 61.7 | 59.7 | 56.5 | 57.2 | 47.2 | 50.4 | 49.2 | 50.7 | 67.5 | 47.6 | 69.7 | 49.4 |
|                          | Serine                     | 48.8 | 43.9 | 40.6 | 39.1 | 45.1 | 54.2 | 33.7 | 36.2 | 44.5 | 53.1 | 59.6 | 38.1 | 30.6 | 44.9 | 45.9 | 61.1 | 47.8 | 66.6 | 57.3 | 55.0 | 57.3 | 54.0 | 50.8 | 69.6 | 57.1 | 63.2 | 51.9 |
|                          | Threonine                  | 46.1 | 44.8 | 48.6 | 42.9 | 47.1 | 72.5 | 33.0 | 39.2 | 42.7 | 48.4 | 54.5 | 41.1 | 42.8 | 38.9 | 39.5 | 58.5 | 49.5 | 63.6 | 62.2 | 49.7 | 59.0 | 45.5 | 46.4 | 68.3 | 49.0 | 66.9 | 49.1 |
|                          | Aspartate                  | 34.5 | 40.0 | 43.4 | 44.7 | 50.4 | 42.0 | 38.5 | 43.3 | 46.8 | 57.1 | 52.3 | 41.9 | 44.9 | 49.0 | 49.9 | 34.9 | 48.5 | 71.5 | 54.6 | 50.7 | 50.3 | 76.2 | 48.7 | 53.6 | 58.4 | 58.8 | 65.1 |
|                          | Isoleucine                 | 37.4 | 42.0 | 51.2 | 42.9 | 44.7 | 50.7 | 38.2 | 39.2 | 40.1 | 49.7 | 70.3 | 41.2 | 38.7 | 41.4 | 44.6 | 70.3 | 50.5 | 53.9 | 67.3 | 52.2 | 63.5 | 51.0 | 47.4 | 62.0 | 51.1 | 62.0 | 46.8 |
|                          | Valine                     | 38.0 | 41.3 | 45.5 | 42.1 | 43.2 | 50.2 | 38.1 | 40.4 | 41.5 | 49.2 | 67.3 | 40.5 | 37.8 | 41.4 | 63.2 | 72.5 | 48.3 | 53.1 | 62.6 | 56.2 | 59.4 | 50.0 | 48.8 | 61.3 | 49.4 | 64.0 | 44.9 |
| Methylated amino acids   | Dimethyl-arginine          | 35.0 | 46.5 | 54.9 | 45.0 | 50.6 | 43.0 | 38.6 | 40.5 | 51.0 | 40.1 | 49.2 | 44.4 | 59.4 | 39.9 | 53.3 | 55.7 | 60.2 | 40.4 | 45.0 | 64.5 | 60.2 | 52.7 | 43.4 | 72.0 | 41.0 | 73.0 | 50.8 |
|                          | N-Methyl-histidine         | 36.4 | 44.5 | 48.1 | 33.7 | 47.9 | 51.0 | 35.0 | 43.6 | 42.7 | 48.0 | 48.3 | 41.5 | 44.6 | 43.3 | 38.8 | 57.4 | 58.5 | 68.5 | 63.0 | 53.6 | 55.2 | 58.1 | 54.5 | 66.6 | 40.4 | 66.5 | 60.3 |
|                          | Trimethyl-lysine           | 41.8 | 42.3 | 49.9 | 41.8 | 44.0 | 49.5 | 37.5 | 53.4 | 46.8 | 51.4 | 42.8 | 50.2 | 48.7 | 45.6 | 46.5 | 49.1 | 54.9 | 54.2 | 49.4 | 55.3 | 39.6 | 60.1 | 51.6 | 91.8 | 49.2 | 57.0 | 45.3 |
|                          | Dimethyl-lysine            | 35.1 | 42.9 | 47.3 | 41.2 | 52.3 | 39.5 | 38.0 | 38.6 | 40.4 | 41.7 | 69.6 | 53.4 | 59.2 | 45.6 | 49.5 | 47.9 | 63.3 | 41.1 | 64.6 | 49.5 | 52.3 | 42.7 | 59.7 | 68.1 | 45.9 | 58.4 | 62.3 |
| Butyro-betaine           | 43.5                       | 48.7 | 49.1 | 41.2 | 54.7 | 41.5 | 44.0 | 49.4 | 49.9 | 42.8 | 42.8 | 52.3 | 44.7 | 40.8 | 61.8 | 45.8 | 46.0 | 51.6 | 51.9 | 45.5 | 75.4 | 44.3 | 44.0 | 68.4 | 45.4 | 78.9 | 45.6 |      |
| Acetylated amino acids   | N-Acetyl-arginine          | 39.5 | 26.2 | 50.4 | 36.4 | 56.3 | 63.8 | 32.0 | 38.8 | 51.3 | 47.0 | 51.4 | 38.6 | 53.2 | 51.6 | 45.5 | 53.5 | 57.4 | 56.6 | 42.3 | 48.2 | 53.5 | 65.1 | 57.7 | 61.1 | 65.1 | 58.0 | 49.5 |
|                          | N2-Acetyl-lysine           | 40.2 | 33.4 | 57.0 | 36.6 | 55.7 | 44.6 | 34.3 | 37.9 | 48.8 | 44.8 | 51.5 | 41.3 | 61.5 | 41.9 | 48.7 | 52.8 | 76.6 | 53.7 | 43.7 | 50.4 | 48.7 | 65.6 | 54.4 | 68.5 | 5    |      |      |



Figure 4.

A

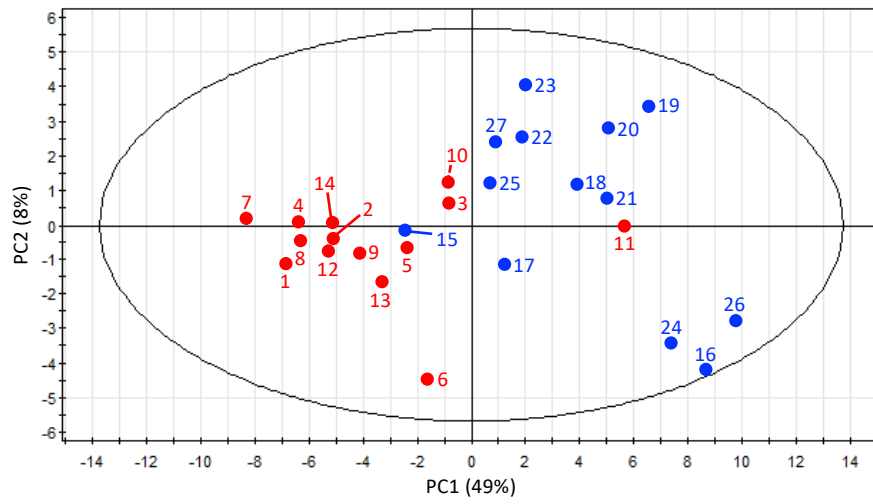

B

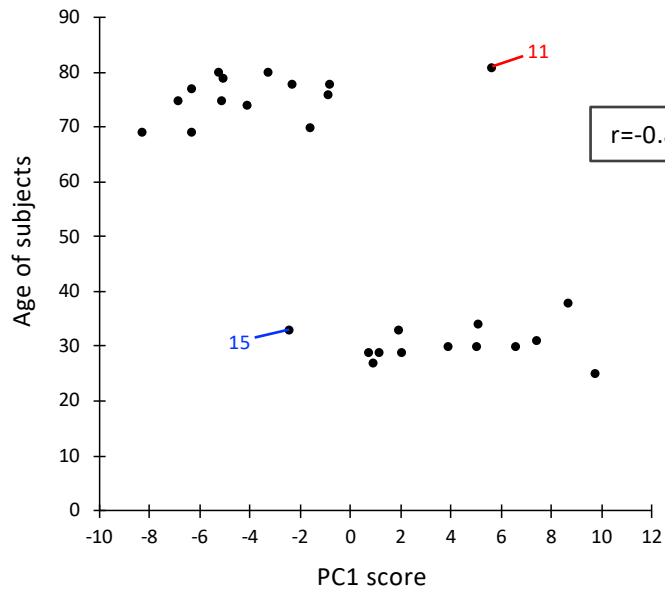

Figure 5.

A

GSSG ----- N-Acetyl-aspartate (-0.81)  
N-Methyl-guanosine (-0.80)  
Dimethyl-guanosine (-0.78)  
Pseudouridine (-0.75)  
Quinolinic acid (-0.73)  
Creatinine (-0.73)  
N-Methyl-histidine (-0.71)  
Adenosine (-0.69)  
Aspartate (-0.67)  
Isoleucine (-0.67)

B

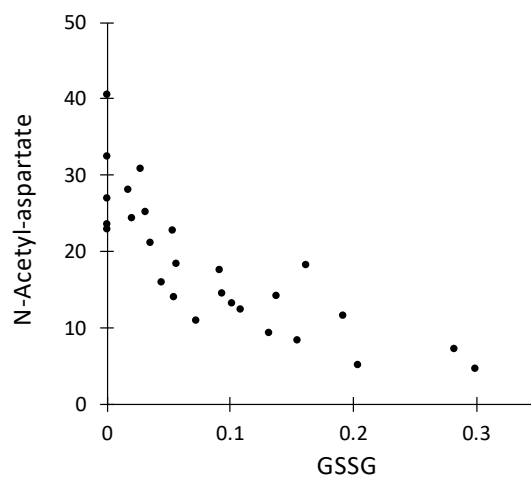

C

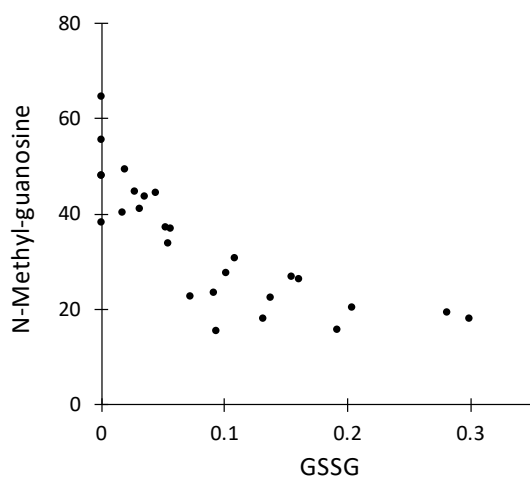

D

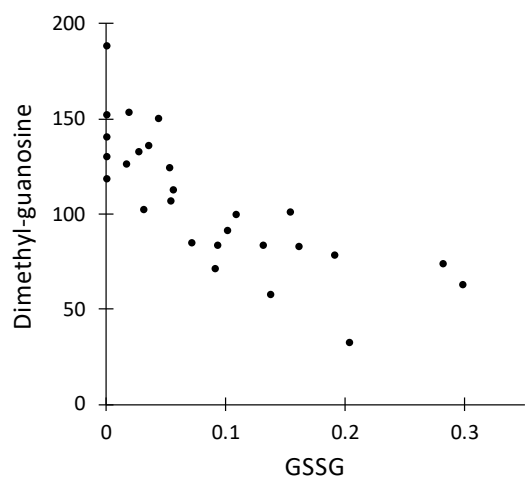

E

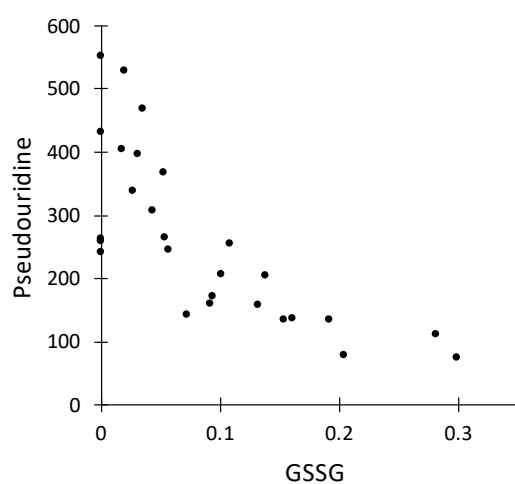

F

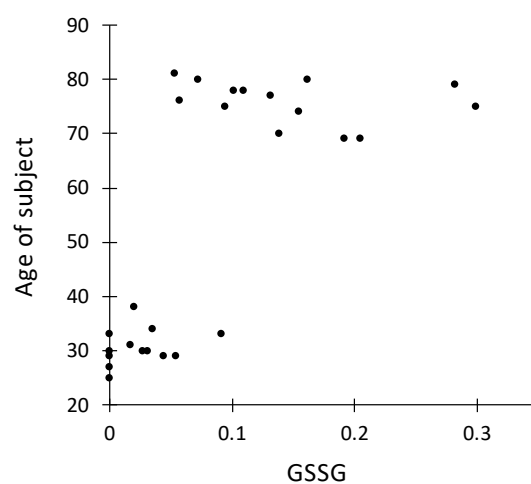

## Supplementary information

### **Aging markers in human urine: A comprehensive, non-targeted LC-MS study**

Takayuki Teruya<sup>1</sup>, Haruhisa Goga<sup>1,2</sup>, and Mitsuhiro Yanagida<sup>1\*</sup>

<sup>1</sup> G0 Cell Unit, Okinawa Institute of Science and Technology Graduate University (OIST),  
Okinawa, Japan

<sup>2</sup> Forensic Laboratory, Department of Criminal Investigation, Okinawa Prefectural Police HQ,  
Okinawa, Japan (on leave of absence)

\* To whom correspondence should be addressed

M. Yanagida, G0 Cell Unit, Okinawa Institute of Science and Technology Graduate University  
(OIST), Onna-son, Okinawa, 904-0495, Japan

Tel +81 98 966 8658

Fax +81 98 966 2890

Email; myanagid@gmail.com

**Supplementary Table S1.** Characteristics of 27 subjects

|                                                             | Youth(n=13)    | Elderly (n=14) | All (n=27)      |
|-------------------------------------------------------------|----------------|----------------|-----------------|
| Age<br>(mean $\pm$ standard deviation)                      | 30.6 $\pm$ 3.2 | 75.8 $\pm$ 3.9 | 54.0 $\pm$ 22.9 |
| Gender (male/female)                                        | 7/6            | 3/11           | 10/17           |
| BMI (kg/m <sup>2</sup> )<br>(mean $\pm$ standard deviation) | 22.5 $\pm$ 2.7 | 24.5 $\pm$ 3.7 | 23.5 $\pm$ 3.4  |

**Supplemental Table S2.** List of 99 urine compounds identified in the present study.

| <i>Category</i> /Compound                                    | Peak abundance | p-value elderly/young | <i>Category</i> /Compound                                                                                                              | Peak abundance | p-value elderly/young |
|--------------------------------------------------------------|----------------|-----------------------|----------------------------------------------------------------------------------------------------------------------------------------|----------------|-----------------------|
| <b><i>Nucleosides, nucleobases, and derivatives (12)</i></b> |                |                       | <b><i>Standard amino acids (17)</i></b>                                                                                                |                |                       |
| Dimethyl-guanosine*                                          | H-M            | 0.00009               | Arginine                                                                                                                               | H-M            | 0.45827               |
| N-Methyl-adenosine*                                          | H-M            | 0.00395               | Histidine*                                                                                                                             | H-M            | 0.00003               |
| Pseudouridine*                                               | H-M            | 0.00005               | Phenylalanine*                                                                                                                         | H-M            | 0.00126               |
| <u>Urate</u>                                                 | H-M            | 0.34988               | Tryptophan*                                                                                                                            | H-M            | 0.00471               |
| Dimethyl-xanthine                                            | H-L            | 0.72031               | Tyrosine                                                                                                                               | M              | 0.12786               |
| Xanthine                                                     | H-L            | 0.68485               | Asparagine*                                                                                                                            | M-L            | 0.00780               |
| N-Methyl-guanosine*                                          | M              | 0.00001               | <u>Glutamate</u>                                                                                                                       | M-L            | 0.40196               |
| Adenosine*                                                   | M-L            | 0.00228               | Glutamine*                                                                                                                             | M-L            | 0.00033               |
| Caffeine                                                     | M-L            | 0.94295               | Leucine*                                                                                                                               | M-L            | 0.00154               |
| Cytidine                                                     | M-L            | 0.48795               | Lysine*                                                                                                                                | M-L            | 0.04265               |
| Hypoxanthine*                                                | M-L            | 0.04265               | Methionine*                                                                                                                            | M-L            | 0.01070               |
| Uridine                                                      | L              | 0.07627               | Proline                                                                                                                                | M-L            | 0.25884               |
| <b><i>Sugar derivatives (4)</i></b>                          |                |                       | Serine*                                                                                                                                | M-L            | 0.00026               |
| <u>Gluconate*</u>                                            | H-M            | 0.01448               | Threonine*                                                                                                                             | M-L            | 0.00662               |
| <u>N-Acetyl-glucosamine*</u>                                 | H-M            | 0.01675               | <u>Aspartate*</u>                                                                                                                      | L              | 0.00275               |
| 1,5-Anhydroglucitol*                                         | M-L            | 0.00003               | Isoleucine*                                                                                                                            | L              | 0.00102               |
| myo-Inositol*                                                | M-L            | 0.03766               | Valine*                                                                                                                                | L              | 0.00033               |
| <b><i>Sugar phosphates (6)</i></b>                           |                |                       | <b><i>Methylated amino acids (12)</i></b>                                                                                              |                |                       |
| <u>Glycerol-phosphate*</u>                                   | H-L            | 0.00228               | Betaine                                                                                                                                | H              | 0.10476               |
| <u>Fructose-1,6-diphosphate*</u>                             | L              | 0.00780               | Dimethyl-arginine*                                                                                                                     | H              | 0.01675               |
| <u>Fructose-6-phosphate*</u>                                 | L              | 0.01070               | N-Methyl-histidine*                                                                                                                    | H              | 0.00042               |
| <u>Glucose-6-phosphate</u>                                   | L              | 0.55018               | <u>Trimethyl-lysine*</u>                                                                                                               | H              | 0.02222               |
| <u>Pentose-phosphate*</u>                                    | L              | 0.00662               | Dimethyl-lysine*                                                                                                                       | H-M            | 0.02222               |
| <u>Phosphoglycerate*</u>                                     | L              | 0.00662               | <u>Dimethyl-proline</u>                                                                                                                | H-M            | 0.18518               |
| <b><i>Vitamins and coenzymes (3)</i></b>                     |                |                       | <u>Trimethyl-tryptophan</u>                                                                                                            | H-L            | 0.75638               |
| <u>Pantothenate</u>                                          | H-M            | 0.18518               | <u>Butyro-betaine*</u>                                                                                                                 | M-L            | 0.04265               |
| 4-Aminobenzoate                                              | H-L            | 0.48795               | N6-Methyl-lysine                                                                                                                       | M-L            | 0.30216               |
| <u>Nicotinamide</u>                                          | M-L            | 1.00000               | <u>Trimethyl-histidine</u>                                                                                                             | M-L            | 0.61595               |
| <b><i>Choline and ethanolamine derivatives (4)</i></b>       |                |                       | <u>Trimethyl-tyrosine</u>                                                                                                              | M-L            | 0.18178               |
| Phosphocholine                                               | M              | 0.32548               | <u>S-Methyl-ergothioneine</u>                                                                                                          | L              | 0.16939               |
| Glycerophosphocholine*                                       | M-L            | 0.00228               | <b><i>Acetylated amino acids (6)</i></b>                                                                                               |                |                       |
| Glycerophosphoethanolamine*                                  | L              | 0.00228               | N-Acetyl-arginine*                                                                                                                     | H-M            | 0.00003               |
| Phosphoethanolamine                                          | L              | 0.21988               | N2-Acetyl-lysine*                                                                                                                      | M              | 0.00915               |
| <b><i>Carnitines (8)</i></b>                                 |                |                       | N6-Acetyl-lysine*                                                                                                                      | M              | 0.00154               |
| Carnitine                                                    | H-M            | 0.45827               | N-Acetyl-aspartate*                                                                                                                    | M-L            | 0.01675               |
| (iso)Butyryl-carnitine*                                      | H-M            | 0.00187               | <u>N-Acetyl-glutamate</u>                                                                                                              | M-L            | 0.09448               |
| (iso)Valeryl-carnitine*                                      | H-L            | 0.01247               | N-Acetyl-(iso)leucine                                                                                                                  | M-L            | 0.09448               |
| <u>Acetyl-carnitine</u>                                      | H-L            | 0.65004               | <b><i>Other amino acids (15)</i></b>                                                                                                   |                |                       |
| Decanoyl-carnitine*                                          | M-L            | 0.00560               | Creatinine*                                                                                                                            | H              | 0.00001               |
| Hexanoyl-carnitine                                           | M-L            | 0.09448               | Hippurate                                                                                                                              | H              | 0.32548               |
| Octanoyl-carnitine*                                          | M-L            | 0.00009               | Indoxyl-sulfate*                                                                                                                       | H              | 0.00187               |
| <u>Propionyl-carnitine</u>                                   | M-L            | 0.98097               | 4-Guanidinobutanoate*                                                                                                                  | H-M            | 0.01448               |
| <b><i>Organic acids (11)</i></b>                             |                |                       | Taurine*                                                                                                                               | H-M            | 0.01448               |
| Citrate                                                      | H-M            | 0.12786               | Acetyl-carnosine                                                                                                                       | M-L            | 0.58264               |
| 2-Hydroxybutyrate*                                           | M-L            | 0.00082               | <u>Carnosine*</u>                                                                                                                      | M-L            | 0.00053               |
| 2-Oxoglutarate                                               | M-L            | 0.42960               | Citrulline                                                                                                                             | M-L            | 0.21988               |
| 3-Hydroxybutyrate*                                           | M-L            | 0.00395               | <u>Creatine</u>                                                                                                                        | M-L            | 0.27995               |
| Arginino-succinate                                           | M-L            | 0.86738               | Keto(iso)leucine*                                                                                                                      | M-L            | 0.03766               |
| cis-Aconitate                                                | M-L            | 0.25884               | Kynurenine*                                                                                                                            | M-L            | 0.01675               |
| <u>Citramalate</u>                                           | M-L            | 0.10476               | Quinolinic acid*                                                                                                                       | M-L            | 0.00102               |
| Glycochenodeoxycholate                                       | M-L            | 0.42960               | <u>S-Adenosyl-methionine</u>                                                                                                           | M-L            | 0.25884               |
| <u>Malate</u>                                                | M-L            | 0.32548               | Ornithine                                                                                                                              | L              | 0.06094               |
| <u>Succinate</u>                                             | M-L            | 0.11587               | <u>S-Adenosyl-homocysteine*</u>                                                                                                        | L              | 0.02547               |
| Glycerate                                                    | L              | 0.14075               | P-values between age groups were calculated by Mann Whitney U-test.                                                                    |                |                       |
| <b><i>Antioxidant (1)</i></b>                                |                |                       | Asterisks indicate 55 compounds that showed significant difference (p<0.05). The peak ratio is described in only asterisked compounds. |                |                       |
| <u>Glutathione disulfide*</u>                                | L              | 0.00003               | Thirty-one RBC-enriched compounds are underlined (Chaleckis et al., 2016).                                                             |                |                       |

**Supplemental Table S3, Chromatogram and mass spectrum data.**

| <i>Category /Compound</i>                                    | Status | Ionization | Theoretical<br>m/z | Detected<br>m/z | m/z error<br>(ppm) | RT (min) |
|--------------------------------------------------------------|--------|------------|--------------------|-----------------|--------------------|----------|
| <b><i>Nucleosides, nucleobases, and derivatives (12)</i></b> |        |            |                    |                 |                    |          |
| Adenosine                                                    | STD    | pos        | 268.1040           | 268.1036        | 1.4                | 6.4      |
| Caffeine                                                     | STD    | pos        | 195.0877           | 195.0872        | 2.8                | 3.9      |
| Cytidine                                                     | STD    | pos        | 244.0928           | 244.0927        | 0.5                | 10.2     |
| Dimethyl-guanosine                                           | STD    | pos        | 312.1302           | 312.1298        | 1.3                | 6.0      |
| Dimethyl-xanthine                                            | STD    | pos        | 181.0720           | 181.0713        | 3.9                | 4.4      |
| Hypoxanthine                                                 | STD    | pos        | 137.0458           | 137.0453        | 3.4                | 7.6      |
| N-Methyl-adenosine                                           | STD    | pos        | 282.1197           | 282.1192        | 1.8                | 12.8     |
| N-Methyl-guanosine                                           | STD    | pos        | 298.1146           | 298.1141        | 1.7                | 7.6      |
| Pseudouridine                                                | STD    | neg        | 243.0623           | 243.0621        | 0.9                | 10.2     |
| Urate                                                        | STD    | neg        | 167.0211           | 167.0210        | 0.9                | 12.7     |
| Uridine                                                      | STD    | neg        | 243.0623           | 243.0621        | 0.7                | 7.2      |
| Xanthine                                                     | STD    | neg        | 151.0261           | 151.0264        | -1.8               | 8.6      |
| <b><i>Sugar derivatives (4)</i></b>                          |        |            |                    |                 |                    |          |
| 1,5-Anhydroglucitol                                          | STD    | neg        | 163.0612           | 163.0614        | -1.0               | 9.9      |
| Gluconate                                                    | STD    | neg        | 195.0510           | 195.0512        | -1.3               | 13.0     |
| myo-Inositol                                                 | STD    | neg        | 179.0561           | 179.0559        | 0.9                | 16.8     |
| N-Acetyl-glucosamine                                         | STD    | pos        | 222.0972           | 222.0968        | 1.6                | 10.4     |
| <b><i>Sugar phosphates (6)</i></b>                           |        |            |                    |                 |                    |          |
| Fructose-1,6-diphosphate                                     | STD    | neg        | 338.9888           | 338.9887        | 0.4                | 18.7     |
| Fructose-6-phosphate                                         | STD    | neg        | 259.0224           | 259.0224        | -0.1               | 16.0     |
| Glucose-6-phosphate                                          | STD    | neg        | 259.0224           | 259.0223        | 0.3                | 16.8     |
| Glycerol-phosphate                                           | STD    | neg        | 171.0064           | 171.0065        | -0.6               | 14.5     |
| Pentose-phosphate                                            | STD    | neg        | 229.0119           | 229.0118        | 0.5                | 15.1     |
| Phosphoglycerate                                             | STD    | neg        | 184.9857           | 184.9857        | -0.1               | 16.7     |
| <b><i>Vitamins and coenzymes (3)</i></b>                     |        |            |                    |                 |                    |          |
| 4-Aminobenzoate                                              | STD    | pos        | 138.0550           | 138.0545        | 3.8                | 7.4      |
| Nicotinamide                                                 | STD    | pos        | 123.0553           | 123.0548        | 3.9                | 4.9      |
| Pantothenate                                                 | STD    | pos        | 220.1179           | 220.1176        | 1.2                | 5.3      |
| <b><i>Choline and ethanolamine derivatives (4)</i></b>       |        |            |                    |                 |                    |          |
| Glycerophosphocholine                                        | STD    | pos        | 258.1101           | 258.1091        | 4.0                | 14.4     |
| Glycerophosphoethanolamine                                   | MS/MS  | neg        | 214.0486           | 214.0486        | 0.01               | 15.4     |
| Phosphocholine                                               | STD    | pos        | 184.0733           | 184.0729        | 2.4                | 15.1     |
| Phosphoethanolamine                                          | STD    | neg        | 140.0118           | 140.0120        | -1.8               | 16.1     |
| <b><i>Carnitines (8)</i></b>                                 |        |            |                    |                 |                    |          |
| Acetyl-carnitine                                             | STD    | pos        | 204.1230           | 204.1227        | 1.6                | 9.1      |
| (iso)Butyryl-carnitine                                       | STD    | pos        | 232.1543           | 232.1540        | 1.3                | 6.1      |
| Carnitine                                                    | STD    | pos        | 162.1125           | 162.1120        | 3.1                | 12.6     |
| Decanoyl-carnitine                                           | STD    | pos        | 316.2482           | 316.2476        | 2.0                | 3.9      |
| Hexanoyl-carnitine                                           | STD    | pos        | 260.1856           | 260.1852        | 1.4                | 5.0      |
| Octanoyl-carnitine                                           | STD    | pos        | 288.2169           | 288.2163        | 1.9                | 4.0      |
| Propionyl-carnitine                                          | STD    | pos        | 218.1387           | 218.1383        | 1.7                | 7.4      |
| (iso)Valeryl-carnitine                                       | STD    | pos        | 246.1700           | 246.1696        | 1.6                | 5.4      |
| <b><i>Organic acids (11)</i></b>                             |        |            |                    |                 |                    |          |
| 2-Hydroxybutyrate                                            | STD    | neg        | 103.0401           | 103.0406        | -4.5               | 4.8      |
| 2-Oxoglutarate                                               | STD    | neg        | 145.0142           | 145.0145        | -2.3               | 14.6     |
| 3-Hydroxybutyrate                                            | STD    | neg        | 103.0401           | 103.0406        | -5.0               | 6.5      |
| Arginino-succinate                                           | STD    | pos        | 291.1299           | 291.1295        | 1.4                | 17.0     |
| cis-Aconitate                                                | STD    | pos        | 175.0237           | 175.0233        | 2.0                | 17.8     |
| Citramalate                                                  | STD    | neg        | 147.0299           | 147.0301        | -1.4               | 13.8     |
| Citrate                                                      | STD    | neg        | 191.0197           | 191.0198        | -0.7               | 17.8     |
| Glycochenodeoxycholate                                       | STD    | neg        | 448.3068           | 448.3075        | -1.5               | 3.3      |
| Malate                                                       | STD    | neg        | 133.0142           | 133.0146        | -3.0               | 15.2     |
| Glycerate                                                    | STD    | neg        | 105.0193           | 105.0198        | -5.2               | 8.6      |
| Succinate                                                    | STD    | neg        | 117.0193           | 117.0197        | -3.4               | 14.4     |
| <b><i>Antioxidants (3)</i></b>                               |        |            |                    |                 |                    |          |
| Glutathione disulfide                                        | STD    | pos        | 613.1592           | 613.1578        | 2.3                | 17.7     |

### Supplemental Table S3, (continued)

| Category /Compound                 | Status | Ionization | Theoretical m/z | Detected m/z | m/z error (ppm) | RT (min) |
|------------------------------------|--------|------------|-----------------|--------------|-----------------|----------|
| <b>Standard amino acids (17)</b>   |        |            |                 |              |                 |          |
| Arginine                           | STD    | pos        | 175.1190        | 175.1186     | 2.5             | 26.2     |
| Asparagine                         | STD    | pos        | 133.0608        | 133.0603     | 4.0             | 14.5     |
| Aspartate                          | STD    | pos        | 134.0448        | 134.0443     | 3.8             | 13.9     |
| Glutamate                          | STD    | pos        | 148.0604        | 148.0600     | 2.8             | 14.0     |
| Glutamine                          | STD    | neg        | 145.0619        | 145.0622     | -1.9            | 14.5     |
| Histidine                          | STD    | pos        | 156.0768        | 156.0762     | 3.7             | 13.9     |
| Isoleucine                         | STD    | neg        | 130.0874        | 130.0877     | -2.3            | 9.3      |
| Leucine                            | STD    | neg        | 130.0874        | 130.0877     | -2.3            | 8.7      |
| Lysine                             | STD    | neg        | 145.0983        | 145.0984     | -1.0            | 25.1     |
| Methionine                         | STD    | pos        | 150.0583        | 150.0579     | 2.9             | 9.6      |
| Phenylalanine                      | STD    | pos        | 166.0863        | 166.0858     | 3.1             | 7.6      |
| Proline                            | STD    | pos        | 116.0706        | 116.0701     | 4.3             | 11.6     |
| Serine                             | STD    | pos        | 106.0499        | 106.0493     | 5.5             | 15.2     |
| Threonine                          | STD    | pos        | 120.0655        | 120.0650     | 3.9             | 13.6     |
| Tryptophan                         | STD    | pos        | 205.0972        | 205.0968     | 2.2             | 10.0     |
| Tyrosine                           | STD    | pos        | 182.0812        | 182.0808     | 2.4             | 12.2     |
| Valine                             | STD    | neg        | 116.0717        | 116.0721     | -3.7            | 11.2     |
| <b>Methylated amino acids (12)</b> |        |            |                 |              |                 |          |
| Betaine                            | STD    | pos        | 118.0863        | 118.0857     | 4.8             | 9.2      |
| Butyro-betaine                     | STD    | pos        | 146.1176        | 146.1171     | 3.5             | 12.7     |
| Dimethyl-arginine                  | STD    | pos        | 203.1503        | 203.1498     | 2.4             | 22.0     |
| Dimethyl-lysine                    | STD    | pos        | 175.1441        | 175.1439     | 1.1             | 21.5     |
| Dimethyl-proline                   | STD    | pos        | 144.1019        | 144.1014     | 3.7             | 8.3      |
| N-Methyl-histidine                 | STD    | pos        | 170.0924        | 170.0921     | 1.6             | 11.5     |
| N6-Methyl-lysine                   | STD    | pos        | 161.1285        | 161.1280     | 3.1             | 24.0     |
| S-Methyl-ergothioneine             | STD    | pos        | 244.1114        | 244.1112     | 0.8             | 8.4      |
| Trimethyl-histidine                | STD    | pos        | 198.1237        | 198.1233     | 1.8             | 11.2     |
| Trimethyl-lysine                   | STD    | pos        | 189.1598        | 189.1593     | 2.5             | 22.7     |
| Trimethyl-tryptophan               | STD    | pos        | 247.1441        | 247.1436     | 2.0             | 6.1      |
| Trimethyl-tyrosine                 | MS/MS  | pos        | 224.1281        | 224.1277     | 1.9             | 7.9      |
| <b>Acetylated amino acids (6)</b>  |        |            |                 |              |                 |          |
| N-Acetyl-arginine                  | STD    | pos        | 217.1295        | 217.1292     | 1.4             | 14.7     |
| N-Acetyl-aspartate                 | STD    | neg        | 174.0408        | 174.0409     | -0.8            | 13.8     |
| N-Acetyl-glutamate                 | STD    | pos        | 190.0710        | 190.0706     | 2.0             | 13.4     |
| N-Acetyl-(iso)leucine              | STD    | pos        | 174.1125        | 174.1120     | 2.8             | 3.7      |
| N2-Acetyl-lysine                   | STD    | pos        | 189.1234        | 189.1230     | 2.3             | 14.9     |
| N6-Acetyl-lysine                   | STD    | pos        | 189.1234        | 189.1230     | 2.3             | 12.3     |
| <b>Other amino acids (15)</b>      |        |            |                 |              |                 |          |
| 4-Guanidinobutanoate               | STD    | pos        | 146.0924        | 146.0919     | 3.3             | 14.9     |
| Acetyl-carnosine                   | STD    | pos        | 269.1244        | 269.1241     | 0.9             | 6.9      |
| Carnosine                          | STD    | pos        | 227.1139        | 227.1133     | 2.5             | 15.6     |
| Citrulline                         | STD    | pos        | 176.1030        | 176.1026     | 2.2             | 15.7     |
| Creatine                           | STD    | neg        | 130.0622        | 130.0625     | -2.1            | 14.2     |
| Creatinine                         | STD    | neg        | 112.0516        | 112.0520     | -3.8            | 7.0      |
| Hippurate                          | STD    | pos        | 180.0655        | 180.0651     | 2.1             | 4.0      |
| Indoxyl-sulfate                    | STD    | neg        | 212.0023        | 212.0021     | 0.8             | 4.7      |
| Keto(iso)leucine                   | STD    | neg        | 129.0557        | 129.0561     | -3.0            | 3.5      |
| Kynurenine                         | STD    | pos        | 209.0921        | 209.0917     | 2.1             | 8.8      |
| Ornithine                          | STD    | neg        | 131.0826        | 131.0829     | -2.1            | 23.0     |
| Quinolinic acid                    | STD    | neg        | 166.0146        | 166.0152     | -3.4            | 14.3     |
| S-Adenosyl-homocysteine            | STD    | pos        | 385.1289        | 385.1279     | 2.6             | 13.3     |
| S-Adenosyl-methionine              | STD    | pos        | 399.1445        | 399.1439     | 1.5             | 17.0     |
| Taurine                            | STD    | neg        | 124.0074        | 124.0077     | -2.7            | 13.5     |

Compounds were identified using either commercially available standards (STD) or by analysis of MS/MS spectra (MS/MS), if no standard was available.

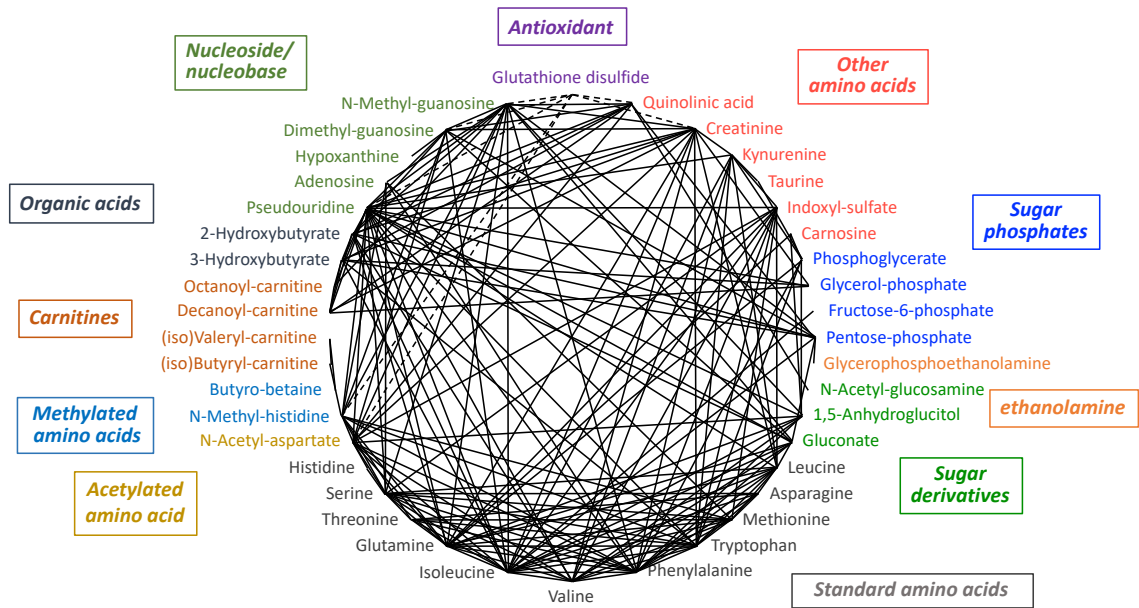

**Supplemental Figure S1.** Of the 55 aging markers, 13 compounds with correlations  $<0.7$ . The 5 most highly correlated compounds for each.



|                                |                                                                                                                                                  |                               |                                                                                                                                                 |
|--------------------------------|--------------------------------------------------------------------------------------------------------------------------------------------------|-------------------------------|-------------------------------------------------------------------------------------------------------------------------------------------------|
| Aspartate -----                | Glutathione disulfide (-0.67)<br>N-Acetyl-aspartate (0.65)<br>Quinolinic acid (0.60)<br>N-Methyl-histidine (0.58)<br>N-Acetyl-glucosamine (0.57) | Glycerophosphocholine -----   | N-Methyl-guanosine (0.59)<br>Dimethyl-guanosine (0.54)<br>Octanoyl-carnitine (0.52)<br>Histidine (0.51)<br>Hypoxanthine (0.48)                  |
| Lysine -----                   | N2-Acetyl-lysine (0.58)<br>Phenylalanine (0.55)<br>Methionine (0.54)<br>Leucine (0.51)<br>Dimethyl-arginine (0.51)                               | Dimethyl-arginine -----       | Phosphoglycerate (0.68)<br>Tryptophan (0.67)<br>Butyro-betaine (0.64)<br>Indoxyl-sulfate (0.62)<br>Glycerol-phosphate (0.62)                    |
| N-Methyl-adenosine -----       | N-Acetyl-glucosamine (0.52)<br>N6-Acetyl-lysine (0.51)<br>Fructose-6-phosphate (0.49)<br>Isoleucine (0.48)<br>N-Methyl-guanosine (0.45)          | Dimethyl-lysine -----         | Indoxyl-sulfate (0.61)<br>Pentose-phosphate (0.58)<br>Fructose-6-phosphate (0.57)<br>Dimethyl-arginine (0.57)<br>Keto(iso)leucine (0.56)        |
| myo-Inositol -----             | Glycerophosphocholine (-0.47)<br>Keto(iso)leucine (0.45)<br>N-Methyl-adenosine (-0.43)<br>S-Adenosyl-homocysteine (-0.36)<br>Adenosine (-0.32)   | Trimethyl-lysine -----        | N-Methyl-histidine (0.58)<br>Asparagine (0.57)<br>Adenosine (0.54)<br>Dimethyl-arginine (0.53)<br>Tryptophan (0.52)                             |
| Fructose-1,6-diphosphate ----- | Pentose-phosphate (0.58)<br>Gluconate (0.58)<br>Leucine (0.57)<br>Dimethyl-guanosine (0.56)<br>2-Hydroxybutyrate (0.55)                          | N6-Acetyl-lysine -----        | Valine (0.61)<br>Phenylalanine (0.57)<br>Asparagine (0.55)<br>N-Methyl-adenosine (0.51)<br>Leucine (0.51)                                       |
| 4-Guanidinobutanoate -----     | Threonine (0.66)<br>Asparagine (0.63)<br>Methionine (0.62)<br>N-Acetyl-arginine (0.62)<br>Serine (0.61)                                          | S-Adenosyl-homocysteine ----- | Octanoyl-carnitine (0.48)<br>N-Methyl-adenosine (0.41)<br>Decanoyl-carnitine (0.41)<br>Glycerophosphocholine (0.40)<br>3-Hydroxybutyrate (0.38) |
| Keto(iso)leucine -----         | Fructose-6-phosphate (0.62)<br>Dimethyl-lysine (0.56)<br>2-Hydroxybutyrate (0.48)<br>myo-Inositol (0.45)<br>3-Hydroxybutyrate (0.44)             |                               |                                                                                                                                                 |

**Supplemental Figure S2.** Of the 55 aging markers, 13 compounds with correlations <0.7. The 5 most highly correlated compounds for each.
